# Supplementary material for: Identification of the Ferroptosis-Related Long Non-Coding RNAs Signature to Improve the Prognosis Prediction in patients with NSCLC
Source: Research Square preprint supplement (doi:10.21203/rs.3.rs-598005/v1), 2021-06-15
Supplement: Supplementary file 1 [file 037dffb470b904a7f9dd727b.xlsx]

## Sheet: Table S1
Symbol	Name	HGNC_ID	Evidence	Test method	Test in	Test setting	Pathway	Confidence	Caution	Protein encoded	UniProtKB	PMID	Remark
RPL8	Ribosomal protein L8	HGNC:10368	Required in erastin-induced ferroptosis. Silencing of it conferred against erastin-induced ferroptosis.	shRNA screening, qPCR, gene silencing	Human	NRAS mutant HT-1080 fibrosarcoma cells; KRAS mutant Calu-1 non small cell lung cancer cell	RPL8 :+: Ferroptosis	Validated	_NA_	60S ribosomal protein L8	P62917 (RL8_HUMAN)	22632970	_NA_
IREB2	Iron response element binding protein 2	HGNC:6115	Required in erastin-induced ferroptosis. Silencing of it conferred against erastin-induced ferroptosis.	shRNA screening, qPCR, gene silencing	Human	NRAS mutant HT-1080 fibrosarcoma cells; KRAS mutant Calu-1 non small cell lung cancer cell	IREB2 :+: Ferroptosis	Validated	_NA_	Iron-responsive element-binding protein 2	P48200 (IREB2_HUMAN)	22632970	_NA_
ATP5MC3	ATP synthase membrane subunit c locus 3	HGNC:843	Required in erastin-induced ferroptosis. Silencing of it conferred against erastin-induced ferroptosis.	shRNA screening, qPCR, gene silencing	Human	NRAS mutant HT-1080 fibrosarcoma cells; KRAS mutant Calu-1 non small cell lung cancer cell	ATP5MC3 :+: Ferroptosis	Validated	_NA_	ATP synthase F(0) complex subunit C3	P48201 (AT5G3_HUMAN)	22632970	ATP5G3 in article
CS	Citrate synthase	HGNC:2422	Required in erastin-induced ferroptosis. Silencing of it conferred against erastin-induced ferroptosis.	shRNA screening, qPCR, gene silencing	Human	NRAS mutant HT-1080 fibrosarcoma cells; KRAS mutant Calu-1 non small cell lung cancer cell	CS :+: Ferroptosis	Validated	_NA_	Citrate synthase	O75390 (CISY_HUMAN)	22632970	_NA_
EMC2	ER membrane protein complex subunit 2	HGNC:28963	Required in erastin-induced ferroptosis. Silencing of it conferred against erastin-induced ferroptosis.	shRNA screening, qPCR, gene silencing	Human	NRAS mutant HT-1080 fibrosarcoma cells; KRAS mutant Calu-1 non small cell lung cancer cell	EMC2 :+: Ferroptosis	Validated	_NA_	ER membrane protein complex subunit 2	Q15006 (EMC2_HUMAN)	22632970	TTC35 in article
ACSF2	Acyl-CoA synthetase family member 2	HGNC:26101	Required in erastin-induced ferroptosis. Silencing of it conferred against erastin-induced ferroptosis.	shRNA screening, qPCR, gene silencing	Human	NRAS mutant HT-1080 fibrosarcoma cells; KRAS mutant Calu-1 non small cell lung cancer cell	ACSF2 :+: Ferroptosis	Validated	_NA_	Medium-chain acyl-CoA ligase ACSF2	Q96CM8 (ACSF2_HUMAN)	22632970	_NA_
NOX1	Nicotinamide adenine dinucleotide phosphate (NADPH) oxidase (NOX) 1	HGNC:7889	Suppresses erastin-induced ferroptosis when inhibited by inhibitor.	Inhibition test by diphenylene iodonium (DPI) and GKT137831.	Human	KRAS mutant Calu-1 non small cell lung cancer cell	NOX1 :+: Ferroptosis	Deduced	The presented inhibition study is not sufficient to confirm its role in ferroptosis.	NADPH oxidase 1	Q9Y5S8 (NOX1_HUMAN)	22632970	_NA_
CYBB	Cytochrome b-245 beta chain	HGNC:2578	Suppresses erastin-induced ferroptosis when inhibited by inhibitor.	Inhibition test by diphenylene iodonium (DPI).	Human	KRAS mutant Calu-1 non small cell lung cancer cell	CYBB :+: Ferroptosis	Deduced	The presented inhibition study is not sufficient to confirm its role in ferroptosis.	Cytochrome b-245 heavy chain	P04839 (CY24B_HUMAN)	22632970	NOX2 in article
NOX3	Nicotinamide adenine dinucleotide phosphate (NADPH) oxidase (NOX) 3	HGNC:7890	Suppresses erastin-induced ferroptosis when inhibited by inhibitor.	Inhibition test by diphenylene iodonium (DPI).	Human	KRAS mutant Calu-1 non small cell lung cancer cell	NOX3 :+: Ferroptosis	Deduced	The presented inhibition study is not sufficient to confirm its role in ferroptosis.	NADPH oxidase 3	Q9HBY0 (NOX3_HUMAN)	22632970	_NA_
NOX4	Nicotinamide adenine dinucleotide phosphate (NADPH) oxidase (NOX) 4	HGNC:7891	Suppresses erastin-induced ferroptosis when inhibited by inhibitor.	Inhibition test by diphenylene iodonium (DPI) and GKT137831.	Human	KRAS mutant Calu-1 non small cell lung cancer cell	NOX4 :+: Ferroptosis	Deduced	The presented inhibition study is not sufficient to confirm its role in ferroptosis.	NADPH oxidase 4	Q9NPH5 (NOX4_HUMAN)	22632970	_NA_
NOX5	Nicotinamide adenine dinucleotide phosphate (NADPH) oxidase (NOX) 5	HGNC:14874	Suppresses erastin-induced ferroptosis when inhibited by inhibitor.	Inhibition test by diphenylene iodonium (DPI).	Human	KRAS mutant Calu-1 non small cell lung cancer cell	NOX5 :+: Ferroptosis	Deduced	The presented inhibition study is not sufficient to confirm its role in ferroptosis.	NADPH oxidase 5	Q96PH1 (NOX5_HUMAN)	22632970	_NA_
DUOX1	Dual oxidase 1	HGNC:3062	Suppresses erastin-induced ferroptosis when inhibited by inhibitor.	Inhibition test by diphenylene iodonium (DPI).	Human	KRAS mutant Calu-1 non small cell lung cancer cell	DUOX1 :+: Ferroptosis	Deduced	The presented inhibition study is not sufficient to confirm its role in ferroptosis.	Dual oxidase 1	Q9NRD9 (DUOX1_HUMAN)	22632970	_NA_
DUOX2	Dual oxidase 2	HGNC:13273	Suppresses erastin-induced ferroptosis when inhibited by inhibitor.	Inhibition test by diphenylene iodonium (DPI).	Human	KRAS mutant Calu-1 non small cell lung cancer cell	DUOX2 :+: Ferroptosis	Deduced	The presented inhibition study is not sufficient to confirm its role in ferroptosis.	Dual oxidase 2	Q9NRD8 (DUOX2_HUMAN)	22632970	_NA_
G6PD	Glucose-6-phosphate dehydrogenase	HGNC:4057	Required in erastin-induced ferroptosis.	shRNA silencing, RT-qPCR	Human	KRAS mutant Calu-1 non small cell lung cancer cell	G6PD :+: Ferroptosis	Validated	_NA_	Glucose-6-phosphate 1-dehydrogenase	P11413 (G6PD_HUMAN)	22632970	_NA_
PGD	Phosphoglycerate dehydrogenase	HGNC:8891	Required in erastin-induced ferroptosis.	shRNA silencing, RT-qPCR	Human	KRAS mutant Calu-1 non small cell lung cancer cell	PGD :+: Ferroptosis	Validated	_NA_	6-phosphogluconate dehydrogenase	P52209 (6PGD_HUMAN)	22632970	_NA_
VDAC2	Valtage-dependent anion channels 2	HGNC:12672	Required in erastin-induced ferroptosis.	shRNA silencing, RT-qPCR	Human	KRAS mutant Calu-1 non small cell lung cancer cell	VDAC2 :+: Ferroptosis	Validated	_NA_	Voltage-dependent anion-selective channel protein 2	P45880 (VDAC2_HUMAN)	22632970	_NA_
PIK3CA	Phosphatidylinositol-4,5-bisphosphate 3-kinase catalytic subunit alpha	HGNC:8975	Inhibitor blocked ferroptotic cell death.	Cell survival assays	Mice	HT22 cells	PIK3CA :-: GSH, GSH :-: Lipid ROS, Lipid ROS :+: Ferroptosis	Validated	Also involved in necrosis and apoptosis.	Phosphatidylinositol 4	P42336 (PK3CA_HUMAN)	24739485	PI3Kalpha in article
FLT3	Fms related tyrosine kinase 3	HGNC:3765	Inhibitor blocked ferroptotic cell death.	Cell survival assays	Mice	HT22 cells	FLT3 :+: Lipid ROS, Lipid ROS :+: Ferroptosis	Validated	Also involved in necrosis and apoptosis.	Receptor-type tyrosine-protein kinase FLT3	P36888 (FLT3_HUMAN)	24739485	_NA_
SCP2	Sterol carrier protein 2	HGNC:10606	SCP-2 inhibitors showed anti-ferroptotic activity, which was substantiated by knocking down SCP-2 in Gpx4−/− cells.	Cell viability test, siRNA-mediated knockdown.	Mice	PZL cells	SCP2 :+: Ferroptosis	Validated	Transient effect. Other translocases may work in parallel.	Non-specific lipid-transfer protein	P22307 (NLTP_HUMAN)	25402683	_NA_
TP53	Tumor protein p53	HGNC:11998	Inhibits cystine uptake and sensitizes cells to ferroptosis. Erastin induced high levels of cell death in p53+/+ MEFs.	Cell death kinetics, shRNA, western blotting, RT-PCR, ChIP assay, cystine uptake assay	Human, mice	H1299, U2OS and MCF7 cells, mouse embryonic fibroblasts	TP53 :-: SLC7A11, SLC7A11 :+: Cystine, Cystine :-: Ferroptosis	Validated	The acetylation-defective mutant (p53[3KR]) also retains the ability to induce ferroptosis upon reactive oxygen species (ROS)-induced stress.	Cellular tumor antigen p53	P04637 (P53_HUMAN)	25799988	_NA_
ACSL4	Acyl-CoA synthetase long chain family member 4	HGNC:3571	Deletion of this gene likely suppress ferroptosis by limiting the membrane-resident pool of oxidation-sensitive fatty acids.	Retroviral-mediated insertional mutagenesis and sequencing	Human	Chronic myeloid leukemia cell line KBM7	ACSL4 :+: Ferroptosis	Predicted	Author prediction based on gene function.	Long-chain-fatty-acid--CoA ligase 4	O60488 (ACSL4_HUMAN)	25965523	_NA_
LPCAT3	Lysophosphatidylcholine acyltransferase 3	HGNC:30244	Deletion of this gene likely suppress ferroptosis by limiting the membrane-resident pool of oxidation-sensitive fatty acids.	Retroviral-mediated insertional mutagenesis and sequencing	Human	Chronic myeloid leukemia cell line KBM7	LPCAT3 :+: Ferroptosis	Predicted	Author prediction based on gene function.	Lysophospholipid acyltransferase 5	Q6P1A2 (MBOA5_HUMAN)	25965523	_NA_
NRAS	NRAS proto-oncogene, GTPase	HGNC:7989	NRAS12V mutant protects RMS13 cells from ferroptotic cell death.	Cell viability assessed by MTT assay, western blot	Human	RMS13 cells	NRAS :+: Ferroptosis	Deduced	Inferred as a promoter because RAS mutant is resistant to ferroptosis.	GTPase NRas	P01111 (RASN_HUMAN)	26157704	_NA_
KRAS	KRAS proto-oncogene, GTPase	HGNC:6407	KRAS12V mutant protects RMS13 cells from ferroptotic cell death.	Cell viability assessed by MTT assay, western blot	Human	RMS13 cells	KRAS :+: Ferroptosis	Deduced	Inferred as a promoter because RAS mutant is resistant to ferroptosis.	GTPase KRas	P01116 (RASK_HUMAN)	26157704	_NA_
HRAS	HRas proto-oncogene, GTPase	HGNC:5173	HRAS12V mutant protects RMS13 cells from ferroptotic cell death.	Cell viability assessed by MTT assay, western blot	Human	RMS13 cells	HRAS :+: Ferroptosis	Deduced	Inferred as a promoter because RAS mutant is resistant to ferroptosis.	GTPase HRas	P01112 (RASH_HUMAN)	26157704	_NA_
TF	Transferrin	HGNC:11740	Essential for the induction of ferroptotic cell death. Transferrin can only interact with transferrin receptor and be transported into the cell when it is loaded with iron.	Killing activity	Mice	Mouse embryonic fibroblasts	TF :+: Ferroptosis	Validated	_NA_	Serotransferrin	P02787 (TRFE_HUMAN)	26166707	Transferrin in article
TFRC	Transferrin receptor	HGNC:11763	RNAi of transferrin receptor (TfR) inhibited ferroptosis.	RNAi	Mice	Mouse embryonic fibroblasts	TFRC :+: Ferroptosis	Validated	_NA_	Transferrin receptor protein 1	P02786 (TFR1_HUMAN)	26166707	Tfr in article
TFR2	Transferrin receptor 2	HGNC:11762	RNAi of transferrin receptor (TfR) inhibited ferroptosis.	RNAi	Mice	Mouse embryonic fibroblasts	TFR2 :+: Ferroptosis	Validated	_NA_	Transferrin receptor protein 2	Q9UP52 (TFR2_HUMAN)	26166707	Tfr in article
SLC38A1	Solute carrier family 38 member 1	HGNC:13447	RNAi knockdown markedly blocked ferroptosis.	RNAi knockdown, cell survival analysis	Mice	Mouse embryonic fibroblasts	SLC38A1 :+: Glutamine, Glutamine :+: Glutamate, Glutamate :+: alpha-Ketoglutarate, alpha-Ketoglutarate :+: Ferroptosis	Validated	_NA_	Sodium-coupled neutral amino acid transporter 1	Q9H2H9 (S38A1_HUMAN)	26166707	_NA_
SLC1A5	Solute carrier family 1 member 5	HGNC:10943	Pharmacological inhibition by L-g-glutamyl-p-nitroanilide or RNAi knockdown markedly blocked ferroptosis.	RNAi knockdown, cell survival analysis	Mice	Mouse embryonic fibroblasts	SLC1A5 :+: Glutamine, Glutamine :+: Glutamate, Glutamate :+: alpha-Ketoglutarate, alpha-Ketoglutarate :+: Ferroptosis	Validated	_NA_	Neutral amino acid transporter B(0)	Q15758 (AAAT_HUMAN)	26166707	_NA_
GLS2	Glutaminase 2	HGNC:29570	Both inhibitor inhibition and gene knockdown inhibit ferroptotic cell death.	shRNA, western blot, cell viability	Mice	Mouse embryonic fibroblasts	GSL2 :+: Glutamate, Glutamate :+: Ferroptosis	Validated	_NA_	Glutaminase liver isoform	Q9UI32 (GLSL_HUMAN)	26166707	_NA_
GOT1	Glutamic-oxaloacetic transaminase 1	HGNC:4432	RNAi reduced ferroptosis.	shRNA, qPCR, cell viability	Mice	Mouse embryonic fibroblasts	GOT1 :+: alpha-Ketoglutarate, alpha-Ketoglutarate :+: Ferroptosis	Validated	_NA_	Aspartate aminotransferase	P17174 (AATC_HUMAN)	26166707	_NA_
CARS1	Cysteinyl-tRNA synthetase 1	HGNC:1493	Required for ferroptosis in diverse cell contexts. Knockdown of CARS inhibited erastin-induced death by preventing the induction of lipid reactive oxygen species, without altering iron homeostasis.	siRNA screen, shRNA, western blot, cell viability	Human, rat	HT-1080 fibrosarcoma cells,BJeLR fibroblast cells, Panc1 cells, A673 (Ewing’s sarcoma) and 143B (osteosarcoma) cells, PC12 cells	CARS1 :-: Transsulfuration pathway, Transsulfuration pathway :-: Ferroptosis	Validated	_NA_	Cysteine--tRNA ligase	P49589 (SYCC_HUMAN)	26184909	CARS in article
ALOX5	Arachidonate 5-lipoxygenase	HGNC:435	The 5-Lipoxygenase inhibitor zileuton protected HT22 neuronal cells from erastin-induced ferroptosis.	Cell Viability Assay, ROS measurement	Mice	HT22 mouse neuronal cell line	ALOX5 :+: Lipid ROS, Lipid ROS :+: Ferroptosis	Validated	_NA_	Arachidonate 5-lipoxygenase	P09917 (LOX5_HUMAN)	26235588	5-LOX in article
KEAP1	Kelch like ECH associated protein 1	HGNC:23177	Knockdown of Keap1 reversed loss of p62-increased degradation of NRF2 in ferroptosis. Keap1 knockdown led to resistance to erastin-induced and sorafenib-induced growth inhibition with decreased ferroptotic events in the absence or presence of p62 knockdown.	Western blot, shRNA knockdown, cell viability	Human, mice	HepG2, Hepa1‐6, Hep3B, and SNU‐182 cells	KEAP1 :-: NFE2L2, NFE2L2 :-: Ferroptosis	Validated	_NA_	Kelch-like ECH-associated protein 1	Q14145 (KEAP1_HUMAN)	26403645	_NA_
HMOX1	Heme oxygenase 1	HGNC:5013	Zinc protoporphyrin IX, a HO-1 inhibitor, prevented Erastin-triggered ferroptotic cancer cell death. Overexpression accelerates erastin-induced cell death.	Cell viability assay, qRT-PCR, western blot	Human, mice	HT-1080 fibrosarcoma cells, mice lung fibroblastic cells	HMOX1 :+: Lipid ROS, Lipid ROS :+: Ferroptosis	Validated	Other articles (PMID 26403645, 28515173) suggest it a suppressor.	Heme oxygenase 1	P09601 (HMOX1_HUMAN)	26405158	HO-1 in article
ATG5	Autophagy related 5	HGNC:589	Knockout or knockdown limited erastin-induced ferroptosis.	shRNA	Human, mice	Mouse embryonic fibroblasts, human pancreatic cancer cell lines (PANC1 and PANC2.03), and the human fibrosarcoma cell line HT-1080	ATG5 :+: Ferroptosis	Validated	_NA_	Autophagy protein 5	Q9H1Y0 (ATG5_HUMAN)	27245739	_NA_
ATG7	Autophagy related 7	HGNC:16935	Knockout or knockdown limited erastin-induced ferroptosis.	shRNA	Human, mice	Mouse embryonic fibroblasts, human pancreatic cancer cell lines (PANC1 and PANC2.03), and the human fibrosarcoma cell line HT-1081	ATG7 :+: Ferroptosis	Validated	_NA_	Ubiquitin-like modifier-activating enzyme ATG7	O95352 (ATG7_HUMAN)	27245739	_NA_
NCOA4	Nuclear receptor coactivator 4	HGNC:7671	Inhibition suppressed ferroptosis, and overexpression promoted ferroptosis.	shRNA, gene transfection	Human	PANC1 or HT-1080 cells	NCOA4 :-: FTH1, FTH1 :-: Ferroptosis	Validated	_NA_	Nuclear receptor coactivator 4	Q13772 (NCOA4_HUMAN)	27245739	_NA_
ALOX12	Arachidonate 12-lipoxygenase, 12S type	HGNC:429	Silencing ALOX genes made cells resistant to ferroptosis.	qPCR	Human	G-401 cells	ALOX12 :+: PUFAs peroxidation, PUFAs peroxidation :+: Ferroptosis	Validated	_NA_	Arachidonate 12-lipoxygenase	P18054 (LOX12_HUMAN)	27506793	_NA_
ALOX12B	Arachidonate 12-lipoxygenase, 12R type	HGNC:430	Silencing ALOX genes made cells resistant to ferroptosis.	qPCR	Human	G-401 cells	ALOX12B :+: PUFAs peroxidation, PUFAs peroxidation :+: Ferroptosis	Validated	_NA_	Arachidonate 12-lipoxygenase	O75342 (LX12B_HUMAN)	27506793	_NA_
ALOX15	Arachidonate 15-lipoxygenase	HGNC:433	Silencing ALOX genes made cells resistant to ferroptosis.	qPCR	Human	G-401 cells	ALOX15 :+: PUFAs peroxidation, PUFAs peroxidation :+: Ferroptosis	Validated	_NA_	Arachidonate 15-lipoxygenase	P16050 (LOX15_HUMAN)	27506793	_NA_
ALOX15B	Arachidonate 15-lipoxygenase type B	HGNC:434	Silencing ALOX genes made cells resistant to ferroptosis. Erastin-induced cell death was rescued by silencing either ALOX15B or ALOXE3, which supported the hypothesis that lipoxygenases are required for ferroptosis.	qPCR, siRNA	Human	G-401, BJeLR and HT-1080 cells	ALOX15B :+: PUFAs peroxidation, PUFAs peroxidation :+: Ferroptosis	Validated	_NA_	Arachidonate 15-lipoxygenase B	O15296 (LX15B_HUMAN)	27506793	_NA_
ALOXE3	Arachidonate lipoxygenase 3	HGNC:13743	Silencing ALOX genes made cells resistant to ferroptosis. Erastin-induced cell death was rescued by silencing either ALOX15B or ALOXE3, which supported the hypothesis that lipoxygenases are required for ferroptosis.	qPCR, siRNA	Human	G-401, BJeLR and HT-1080 cells	ALOXE3 :+: PUFAs peroxidation, PUFAs peroxidation :+: Ferroptosis	Validated	_NA_	Hydroperoxide isomerase ALOXE3	Q9BYJ1 (LOXE3_HUMAN)	27506793	_NA_
PHKG2	Phosphorylase kinase catalytic subunit gamma 2	HGNC:8931	U-2-OS cells became resistant to erastin upon PHKG2 silencing. Erastin-treated HT-1080 cells were rescued by shPHKG2.	shRNA suppressor screen, qPCR, cellular iron staining, cell viability	Human	U-2-OS, HT-1080 cells	PHKG2 :+: PUFAs peroxidation, PUFAs peroxidation :+: Ferroptosis	Validated	_NA_	Phosphorylase b kinase gamma catalytic chain	P15735 (PHKG2_HUMAN)	27506793	_NA_
ACO1	Aconitase 1	HGNC:117	The gene targets of the enriched shRNAs are potential genes that positively regulate ferroptosis.	RNAi screening	Mice	Mouse embryonic fibroblasts	ACO1 :+: Lipid ROS, Lipid ROS :+: Ferroptosis	Screened	_NA_	Cytoplasmic aconitate hydratase	P21399 (ACOC_HUMAN)	27514700	_NA_
G6PDX	_NA_	_NA_	The gene targets of the enriched shRNAs are potential genes that positively regulate ferroptosis.	RNAi screening	Mice	Mouse embryonic fibroblasts	G6PDX :+: Lipid ROS, Lipid ROS :+: Ferroptosis	Screened	_NA_	_NA_	_NA_	27514700	Not found in HGNC
ULK1	Unc-51 like autophagy activating kinase 1	HGNC:12558	Potential positive regulators of ferroptosis. Knockout of ULK1 led to significantly lower levels of erastin-induced ferroptosis in a dose- and time-dependent manner.	RNAi screening, gene knockout	Mice	Mouse embryonic fibroblasts	ULK1 :+: Lipid ROS, Lipid ROS :+: Ferroptosis	Validated	_NA_	Serine/threonine-protein kinase ULK1	O75385 (ULK1_HUMAN)	27514700	_NA_
ATG3	Autophagy related 3	HGNC:20962	Potential positive regulators of ferroptosis. Knockout of ATG3 greatly reduced the sensitivity of MEFs to ferropotosis, and reconstituting ATG3 back to these cells restored the ferroptosis sensitivity.	RNAi screening, gene knockout	Mice	Mouse embryonic fibroblasts	ATG3 :+: Lipid ROS, Lipid ROS :+: Ferroptosis	Validated	_NA_	Ubiquitin-like-conjugating enzyme ATG3	Q9NT62 (ATG3_HUMAN)	27514700	_NA_
ATG4D	Autophagy related 4D cysteine peptidase	HGNC:20789	Potential positive regulators of ferroptosis.	RNAi screening	Mice	Mouse embryonic fibroblasts	ATG4D :+: Lipid ROS, Lipid ROS :+: Ferroptosis	Screened	_NA_	Cysteine protease ATG4D	Q86TL0 (ATG4D_HUMAN)	27514700	_NA_
BECN1	Beclin 1	HGNC:1034	Potential positive regulators of ferroptosis.	RNAi screening	Mice	Mouse embryonic fibroblasts	BECN1 :+: Lipid ROS, Lipid ROS :+: Ferroptosis	Screened	_NA_	Beclin-1	Q14457 (BECN1_HUMAN)	27514700	_NA_
MAP1LC3A	Microtubule associated protein 1 light chain 3 alpha	HGNC:6838	Potential positive regulators of ferroptosis.	RNAi screening	Mice	Mouse embryonic fibroblasts	MAP1LC3A :+: Lipid ROS, Lipid ROS :+: Ferroptosis	Screened	_NA_	Microtubule-associated proteins 1A/1B light chain 3A	Q9H492 (MLP3A_HUMAN)	27514700	_NA_
GABARAPL2	GABA type A receptor associated protein like 2	HGNC:13291	Potential positive regulators of ferroptosis.	RNAi screening	Mice	Mouse embryonic fibroblasts	GABARAPL2 :+: Lipid ROS, Lipid ROS :+: Ferroptosis	Screened	_NA_	Gamma-aminobutyric acid receptor-associated protein-like 2	P60520 (GBRL2_HUMAN)	27514700	_NA_
GABARAPL1	GABA type A receptor associated protein like 1	HGNC:4068	Potential positive regulators of ferroptosis.	RNAi screening	Mice	Mouse embryonic fibroblasts	GABARAPL1 :+: Lipid ROS, Lipid ROS :+: Ferroptosis	Screened	_NA_	Gamma-aminobutyric acid receptor-associated protein-like 1	Q9H0R8 (GBRL1_HUMAN)	27514700	_NA_
ATG16L1	Autophagy related 16 like 1	HGNC:21498	Potential positive regulators of ferroptosis.	RNAi screening	Mice	Mouse embryonic fibroblasts	ATG16L1 :+: Lipid ROS, Lipid ROS :+: Ferroptosis	Screened	_NA_	Autophagy-related protein 16-1	Q676U5 (A16L1_HUMAN)	27514700	_NA_
WIPI1	WD repeat domain, phosphoinositide interacting 1	HGNC:25471	Potential positive regulators of ferroptosis.	RNAi screening	Mice	Mouse embryonic fibroblasts	WIPI1 :+: Lipid ROS, Lipid ROS :+: Ferroptosis	Screened	_NA_	WD repeat domain phosphoinositide-interacting protein 1	Q5MNZ9 (WIPI1_HUMAN)	27514700	_NA_
WIPI2	WD repeat domain, phosphoinositide interacting 2	HGNC:32225	Potential positive regulators of ferroptosis.	RNAi screening	Mice	Mouse embryonic fibroblasts	WIPI2 :+: Lipid ROS, Lipid ROS :+: Ferroptosis	Screened	_NA_	WD repeat domain phosphoinositide-interacting protein 2	Q9Y4P8 (WIPI2_HUMAN)	27514700	_NA_
SNX4	Sorting nexin 4	HGNC:11175	Potential positive regulators of ferroptosis.	RNAi screening	Mice	Mouse embryonic fibroblasts	SNX4 :+: Lipid ROS, Lipid ROS :+: Ferroptosis	Screened	_NA_	Sorting nexin-4	O95219 (SNX4_HUMAN)	27514700	_NA_
ATG13	Autophagy related 13	HGNC:29091	Knockout of ATG13 greatly reduced the sensitivity of MEFs to ferropotosis, and reconstituting ATG13 back to these cells restored the ferroptosis sensitivity.	Gene knockout	Mice	Mouse embryonic fibroblasts	ATG13 :+: Lipid ROS, Lipid ROS :+: Ferroptosis	Validated	_NA_	Autophagy-related protein 13	O75143 (ATG13_HUMAN)	27514700	_NA_
ULK2	Unc-51 like autophagy activating kinase 2	HGNC:13480	Knockout of ULK2 led to significantly lower levels of erastin-induced ferroptosis in a dose- and time-dependent manner.	Gene knockout	Mice	Mouse embryonic fibroblasts	ULK2 :+: Lipid ROS, Lipid ROS :+: Ferroptosis	Validated	_NA_	Serine/threonine-protein kinase ULK2	Q8IYT8 (ULK2_HUMAN)	27514700	_NA_
SAT1	Spermidine/spermine N1-acetyltransferase 1	HGNC:10540	p53-mediated activation of SAT1 contributes to ferroptotic cell death in the presence of ROS stress. Knockdown of Sat1 partially rescued ROS-induced ferroptosis.	qRT-PCR, siRNA, CRISPR-cas9, western blot	Human, mice	H1299, U2OS cells, mouse embryonic fibroblasts, mouse xenograft	SAT1 :+: ALOX15, ALOX15 :+: Lipid ROS, Lipid ROS :+: Ferroptosis	Validated	Activated by p53.	Diamine acetyltransferase 1	P21673 (SAT1_HUMAN)	27698118	_NA_
EGFR	Epidermal growth factor receptor	HGNC:3236	Cell death in activated EGFR mutant cells occurs by ferroptosis. Inhibiting EGFR and MAPK signaling rescued cell viability following cystine withdrawal.	Fluorescence-activated cell sorting (FACS) analysis, cell viability	Human	Human mammary epithelial) cells	EGFR :+: MAPK, MAPK :+: Ferroptosis	Validated	_NA_	Epidermal growth factor receptor	P00533 (EGFR_HUMAN)	28297659	_NA_
MAPK3	Mitogen-activated protein kinase 3	HGNC:6877	Inhibiting EGFR and MAPK signaling rescued cell viability following cystine withdrawal.	Immunoblots, lucifer yellow infiltration, cell viability, fluorescence-activated cell sorting (FACS) analysis	Human	Human mammary epithelial) cells	MAPK :-: GPX4, GPX4 :-: Lipid ROS, MAPK :+: NOX4, NOX4 :+: H2O2, H2O2 :+: Lipid ROS, Lipid ROS :+: Ferroptosis	Validated	_NA_	Mitogen-activated protein kinase 3	P27361 (MK03_HUMAN)	28297659	ERK1 in article
MAPK1	Mitogen-activated protein kinase 1	HGNC:6871	Inhibiting EGFR and MAPK signaling rescued cell viability following cystine withdrawal.	Immunoblots, lucifer yellow infiltration, cell viability, fluorescence-activated cell sorting (FACS) analysis	Human	Human mammary epithelial) cells	MAPK :-: GPX4, GPX4 :-: Lipid ROS, MAPK :+: NOX4, NOX4 :+: H2O2, H2O2 :+: Lipid ROS, Lipid ROS :+: Ferroptosis	Validated	_NA_	Mitogen-activated protein kinase 1	P28482 (MK01_HUMAN)	28297659	ERK2 in article
BID	BH3 interacting domain death agonist	HGNC:1050	BID deletion prevents erastin- and glutamate-induced cell death. BID inhibition inhibited erastin-induced ferroptosis.	Cell viability, western blot, CRISPR/Cas9, gene transfection	Mice	HT-22 cells, mouse embryonic fibroblasts	BID :+: Ferroptosis	Validated	_NA_	BH3-interacting domain death agonist	P55957 (BID_HUMAN)	28384611	_NA_
ZEB1	Zinc finger E-box binding homeobox 1	HGNC:11642	Knockout of ZEB1 prevents cell death induced by GPX4 inhibition.	sgRNA, cell viability	Human	KP4 pancreatic cancer cells	ZEB1 :+: Lipid ROS, Lipid ROS :+: Ferroptosis	Validated	_NA_	Zinc finger E-box-binding homeobox 1	P37275 (ZEB1_HUMAN)	28678785	_NA_
DPP4	Dipeptidyl peptidase 4	HGNC:3009	Required for ferroptosis in TP53-deficient CRC cells.	Cell death, RNAi, western blot, enzyme activity	Human, mice	TP53-/- HCT116 cells, athymic nude mice	DPP4 :+: Lipid ROS, Lipid ROS :+: Ferroptosis	Validated	_NA_	Dipeptidyl peptidase 4	P27487 (DPP4_HUMAN)	28813679	_NA_
CDKN2A	Cyclin dependent kinase inhibitor 2A	HGNC:1787	Combination of ARF induction and ROS treatment induced ferroptotic cell death. Knockdown of endogenous ARF protected cells from ROS-induced cell death.	RNAi, immunoblot, phase-contrast image, cell death quantification	Human, mice	H1299, SaoS2, U2OS cells, mouse embryonic fibroblasts	CDKN2A :-: NFE2L2, NFE2L2 :+: SLC7A11, SLC7A11 :-: Ferroptosis, CDKN2A :+: p53, p53 :-: SLC7A11, SLC7A11 :-: Ferroptosis	Validated	_NA_	Cyclin-dependent kinase inhibitor 2A	P42771 (CDN2A_HUMAN)	28985506	ARF in article
PEBP1	Phosphatidylethanolamine binding protein 1	HGNC:8630	Elevated levels of PEBP1 resulted in increased sensitivity of HK2 cells to RSL3 whereas lowered contents of PEBP1 in HAEC and HT22 cells were associated with decreased sensitivity to ferroptosis.	Western blot, siRNA, cell death assay	Human, mice	HK2, HAEC and HT22 cells	(PEBP1/15LO) :+: Ferroptosis	Validated	_NA_	Phosphatidylethanolamine-binding protein 1	P30086 (PEBP1_HUMAN)	29053969	_NA_
SOCS1	Suppressor of cytokine signaling 1	HGNC:19383	Expression of SOCS1 sensitized cells to ferroptosis inducer. This effect of SOCS1 was efficiently blocked by ferroptosis inhibitor. Expression of SOCS1 reduced the levels of GSH, explaining in part its ability to sensitize cells to ferroptosis.	Cell death assay, cell viability assay, qPCR	Human	U2OS or IMR90 cells	SOCS1 :+: p53, p53 :-: SLC7A11, SLC7A11 :+: GSH, GSH :-: Ferroptosis	Validated	_NA_	Suppressor of cytokine signaling 1	O15524 (SOCS1_HUMAN)	29081404	_NA_
CDO1	Cysteine dioxygenase type 1	HGNC:1795	CDO1 suppression contributes to ferroptosis resistance.	siRNA, western blot, MTT assay	Human	Gastric cancer cells AGS, BGC823, athymic nude mice	CDO1 :-: GPX4, GPX4 :-: Ferroptosis	Validated	_NA_	Cysteine dioxygenase type 1	Q16878 (CDO1_HUMAN)	29144989	_NA_
MYB	MYB proto-oncogene, transcription factor	HGNC:7545	Erastin-induced ferroptosis was restrained when c-Myb was suppressed.	Western blot, siRNA, qRT-PCR, MTT assay	Human	Gastric cancer cells AGS, BGC823, MKN45, SGC7901, and MGC803	MYB :+: CDO1, CDO1 :-: GPX4, GPX4 :-: Ferroptosis	Validated	_NA_	Transcriptional activator Myb	P10242 (MYB_HUMAN)	29144989	C-Myb in article
MAPK8	Mitogen-activated protein kinase 8	HGNC:6881	JNK1/2 inhibitors inhibited t-BHP-induced ferroptosis. t-BHP treatment significantly increased the protein expression of p-JNK.	MitoSOX probe, luminometer kit, C11-BODIPY probe, western blot	Rat	PC12 cells	MAPK8 :+: Lipid ROS, Lipid ROS :+: Ferroptosis	Validated	_NA_	Mitogen-activated protein kinase 8	P45983 (MK08_HUMAN)	29330409	JNK1 in article
MAPK9	Mitogen-activated protein kinase 9	HGNC:6886	JNK1/2 inhibitors inhibited t-BHP-induced ferroptosis. t-BHP treatment significantly increased the protein expression of p-JNK.	MitoSOX probe, luminometer kit, C11-BODIPY probe, western blot	Rat	PC12 cells	MAPK9 :+: Lipid ROS, Lipid ROS :+: Ferroptosis	Validated	_NA_	Mitogen-activated protein kinase 9	P45984 (MK09_HUMAN)	29330409	JNK2 in article
CHAC1	ChaC glutathione specific gamma-glutamylcyclotransferase 1	HGNC:28680	CHAC1 degradation of GSH might enhance cystine-starvation-induced cell death.	Western blot, real-time PCR, cell viability assay, siRNA, GSH assay kit	Human	MDA-MB-231, Hs 578T, and HCC 1937 cells	CHAC1 :-: GSH, GSH :-: Ferroptosis	Validated	_NA_	Glutathione-specific gamma-glutamylcyclotransferase 1	Q9BUX1 (CHAC1_HUMAN)	29383104	_NA_
MAPK14	Mitogen-activated protein kinase 14	HGNC:6876	Ferroptosis was blocked by inhibiting p38 MAPK activation.	Cell viability assay, lipid ROS measurement, RT-qPCR, western blot	Mice	TM4 Sertoli cells	MAPK14 :+: Ferroptosis	Validated	_NA_	Mitogen-activated protein kinase 14	Q16539 (MK14_HUMAN)	29436589	p38 MAPK in article
LINC00472	Long intergenic non-protein coding RNA 472	HGNC:21380	Increases erastin-induced growth inhibition, whereas depletion of P53RRA decreased erastin-induced growth inhibition.	Bisulfite sequencing, RNA pull-down, mass spectrometry, RNA immunoprecipitation, qRT-PCR, cell viability assay	Human	Lung cancer A549, SPCA1, and H522 cells	LINC00472 :+: p53, p53 :+: Ferroptosis	Validated	Also triggers apoptosis.	Putative uncharacterized protein encoded by LINC00472	Q9H8W2 (CF155_HUMAN)	29588351	P53RRA in article
PRKAA2	Protein kinase AMP-activated catalytic subunit alpha 2	HGNC:9377	Inhibition of PRKAA/AMPKalpha diminishes ferroptosis.	siRNA, western blot, cell viability assay, GSH assay, lipid peroxidation assay, iron assay	Human	HCT116 and CX-1 cells	PRKAA2 :+: (BECN1/SLC7A11), (BECN1/SLC7A11) :+: Ferroptosis	Validated	_NA_	5'-AMP-activated protein kinase catalytic subunit alpha-2	P54646 (AAPK2_HUMAN)	30057310	PRKAA in article
PRKAA1	Protein kinase AMP-activated catalytic subunit alpha 1	HGNC:9376	Inhibition of PRKAA/AMPKalpha diminishes ferroptosis.	siRNA, western blot, cell viability assay, GSH assay, lipid peroxidation assay, iron assay	Human	HCT116 and CX-1 cells	PRKAA1 :+: (BECN1/SLC7A11), (BECN1/SLC7A11) :+: Ferroptosis	Validated	_NA_	5'-AMP-activated protein kinase catalytic subunit alpha-1	Q13131 (AAPK1_HUMAN)	30057310	AMPK alpha in article
ELAVL1	ELAV like RNA binding protein 1	HGNC:3312	ELAVL1 siRNA led to ferroptosis resistance, whereas ELAVL1 plasmid contributed to classical ferroptotic events.	Immunohistochemistry, hydroxyproline assay, immunofluorescence, cell viability assay, western blot, qPCR, iron assay, ROS assay, RNAi	Human, mice	Human liver specimens and hepatic stellate cell; C57BL/6 mice; mouse hepatocyte and hepatic stellate cell; HSC-LX2 and HSC-T6 cells	ELAVL1 :+: Ferroptosis	Validated	_NA_	ELAV-like protein 1	Q15717 (ELAV1_HUMAN)	30081711	_NA_
BAP1	BRCA1 associated protein 1	HGNC:950	Suppresses SLC7A11-mediated cystine uptake and promotes ferroptosis. BAP1 mutants lose their abilities to repress SLC7A11 and to promote ferroptosis.	Flow cytometry, cell viability assay, cell death assay, western blot, gene knockout, lipid peroxidation assay, cystine uptake assay, GSH assay, RT-PCR, ChIP-qPCR, luciferase reporter assay, immunoprecipitation, IHC, ChIP-seq	Human	HEK-293T, Caki1, 786-O, 769-P, ACHN and NCI-H226 cell lines; RCC4, UMRC2, SLR20, and UMRC6 cell lines; TK10 cell line; athymic nude mice	BAP1 :-: SLC7A11, SLC7A11 :-: Lipid ROS, Lipid ROS :+: Ferroptosis	Validated	_NA_	Ubiquitin carboxyl-terminal hydrolase BAP1	Q92560 (BAP1_HUMAN)	30202049	_NA_
ABCC1	ATP binding cassette subfamily C member 1	HGNC:51	Accelerates ferroptosis. Disruption of MRP1 inhibited ferroptosis potently.	Western blot, GSH assay, dead cell counts, gene transfection, CRISPR/Cas9, cell viability assay, RT-qPCR	Human	HAP1, H1299, U-2 OS cells	ABCC1 :-: GSH, GSH :-: Ferroptosis	Validated	_NA_	Multidrug resistance-associated protein 1	P33527 (MRP1_HUMAN)	30726737	MRP1 in article
MIR6852	microRNA 6852	HGNC:49993	Promotes ferroptosis. Binds to LINC0033 and serves as a negative upstream regulator of CBS-mediated ferroptosis inhibition.	qRT-PCR, gene knockdown, luciferase assay, gene overexpression, MTT assay, colony-formation assay	Human	A549 and SPC-A-1 cells	MIR6852 :-: CBS, CBS :-: Ferroptosis	Validated	_NA_	_NA_	_NA_	30787392	_NA_
ACVR1B	Activin A receptor type 1B	HGNC:172	Inhibition attenuated erastin-induced ferroptosis.	Western blot, siRNA, glutathione assay, RT-PCR, cell viability assay	Human	HK-2 cells	ACVR1B :-: NFE2L2, NFE2L2 :-: Ferroptosis	Validated	_NA_	Activin receptor type-1B	P36896 (ACV1B_HUMAN)	30804470	ALK4 in article
TGFBR1	Transforming growth factor beta receptor 1	HGNC:11772	Inhibition attenuated erastin-induced ferroptosis.	Western blot, siRNA, glutathione assay, RT-PCR, cell viability assay	Human	HK-2 cells	TGFBR1 :-: NFE2L2, NFE2L2 :-: Ferroptosis	Validated	_NA_	TGF-beta receptor type-1	P36897 (TGFR1_HUMAN)	30804470	ALK5 in article
EPAS1	Endothelial PAS domain protein 1	HGNC:3374	A driver of ferroptosis susceptibility. Ablation reduced susceptibility to ferroptosis.	CRISPR, sgRNA, shRNA, immunoblot, cell viability, western blot	Mice	786-O cells	EPAS1 :+: HILPDA, EPAS1 :+: PLIN2, HILPDA :+: PUFA, PLIN2 :+: PUFA, PUFA :+: PUFA-phospholipid hydroperoxides, PUFA-phospholipid hydroperoxides :+: Ferroptosis	Validated	_NA_	Endothelial PAS domain-containing protein 1	Q99814 (EPAS1_HUMAN)	30962421	HIF-2alpha in article
HILPDA	Hypoxia inducible lipid droplet associated	HGNC:28859	Promotes ferroptosis sensitivity downstream of HIF-2alpha.	RNA-Seq, western blot, qRT-PCR, shRNA, cell viability, immunoblot	Mice	786-O cells	HILPDA :+: PUFA, PUFA :+: PUFA-phospholipid hydroperoxides, PUFA-phospholipid hydroperoxides :+: Ferroptosis	Validated	_NA_	Hypoxia-inducible lipid droplet-associated protein	Q9Y5L2 (HLPDA_HUMAN)	30962421	_NA_
HIF1A	Hypoxia inducible factor 1 subunit alpha	HGNC:4910	Re-sensitized HIF-2alpha-null cells to ferroptosis. Induce ferroptosis sensitivity in cancer cells.	cDNA screenin, cell viability	Mice	786-O cells	HIF1A :+: HILPDA, HIF1A :+: PLIN2, HILPDA :+: PUFA, PLIN2 :+: PUFA, PUFA :+: PUFA-phospholipid hydroperoxides, PUFA-phospholipid hydroperoxides :+: Ferroptosis	Validated	_NA_	Hypoxia-inducible factor 1-alpha	Q16665 (HIF1A_HUMAN)	30962421	HIF-1alpha in article
IFNG	Interferon gamma	HGNC:5438	Interferon gamma released from CD8+ T cells downregulates the expression of SLC3A2 and SLC7A11, and as a consequence, promotes tumour cell lipid peroxidation and ferroptosis.	BODIPY-C11, liperfluo staining, cell death measurement, FACS, cell proliferation and viability assay, qPCR, immunoblotting, glutathione quantification, MDA assay, glutamate assay	Human, mice	HT-1080, A375, B16-F0, ID8 cells, female NSG and C57BL/6 mice	IFNG :-: SLC3A2, IFNG :-: SLC7A11, SLC3A2 :+: System Xc-, SLC7A11 :+: System Xc-, System Xc- :+: Cystine, Cystine :-: Lipid ROS, Lipid ROS :+: Ferroptosis	Validated	_NA_	Interferon gamma	P01579 (IFNG_HUMAN)	31043744	IFNgamma in article
ANO6	Anoctamin 6	HGNC:25240	Essential for ferroptosis. Inhibition blocked ferroptotic cell death induced by RSL3/erastin.	Immunocytochemistry, RT-PCR, TUNEL Assay, flow Cytometry, LDH assay, gene knockout, siRNA	Human, mice	A549, Cal27, HT29 and MG-63 cells, Cx3cr1-Cre mice	ANO6 :+: Ferroptosis	Validated	_NA_	Anoctamin-6	Q4KMQ2 (ANO6_HUMAN)	31060306	_NA_
LPIN1	Lipin 1	HGNC:13345	Overexpression of adipose lipin‐1 in mice facilitated the onset of hepatic ferroptosis.	Enzyme‐linked immunosorbent assay, lipid peroxidation assay, iron assay, MDA assay, qPCR, GSH assay	Mice	C57BL/6 mice	LPIN1 :+: Ferroptosis	Validated	_NA_	Phosphatidate phosphatase LPIN1	Q14693 (LPIN1_HUMAN)	31061954	_NA_
HMGB1	High mobility group box 1	HGNC:4983	Required for erastin-induced ferroptosis. Knockdown of HMGB1 decreased erastin-induced cell death.	Gene transfection, RNAi, cell viability assay, ELISA, LDH assay, flow cytometry, qPCR, western blot, electron microscopy	Human, mice	HL-60 cell, male NOD/SCID mice	HMGB1 :+: Ferroptosis	Validated	_NA_	High mobility group protein B1	P09429 (HMGB1_HUMAN)	31105999	_NA_
TNFAIP3	TNF alpha induced protein 3	HGNC:11896	Overexpression increased ROS generation and enhanced erastin-induced ferroptosis, whereas knockdown inhibited erastin-induced ferroptosis.	Lentivirus transduction, CCK-8 assay, DYE670 staining assay, ROS staining assay, RT-qPCR, western blot	Human	HUVEC cells	TNFAIP3 :+: ACSL4, ACSL4 :+: Lipid ROS, TNFAIP3 :-: GPX4, GPX4 :-: Lipid ROS, Lipid ROS :+: Ferroptosis	Validated	_NA_	Tumor necrosis factor alpha-induced protein 3	P21580 (TNAP3_HUMAN)	31160087	Zinc lipoprotein A20 in article
TLR4	Toll like receptor 4	HGNC:11850	Knockdown inhibited ferroptosis.	Immunohistochemistry, western blot, cell death assay, siRNA	Rat	Sprague Dawley rats	TLR4 :+: Ferroptosis	Validated	_NA_	Toll-like receptor 4	O00206 (TLR4_HUMAN)	31196626	_NA_
ATF3	Activating transcription factor 3	HGNC:785	Promotes ferroptosis induced by erastin.	Cell viability assay, transfection, lentiviral infection, qRT-PCR, western blot	Human	HT1080 cells, retinal pigment epithelial cells	ATF3 :-: SLC7A11, SLC7A11 :+: System Xc-, System Xc- :+: GSH, GSH :-: Lipid ROS, Lipid ROS :+: Ferroptosis	Validated	_NA_	Cyclic AMP-dependent transcription factor ATF-3	P18847 (ATF3_HUMAN)	31273299	_NA_
ATM	ATM serine/threonine kinase	HGNC:795	Essential for ferroptosis. Genetic knockdown and chemical inhibition of ATM both suppress ferroptotic cell death.	siRNA, western blot, nuclear/cytosol fraction, cell viability, cell death, GSH assay, kinome screen, qRT-PCR, immunofluorescence assay	Human	MDA-MB-231, RCC4, 293T, and HT-1080 cell lines	ATM :-: MTF1, MTF1 :+: FTL, MTF1 :+: FTH1, FTL :-: Ferroptosis, FTH1 :-: Ferroptosis	Validated	_NA_	Serine-protein kinase ATM	Q13315 (ATM_HUMAN)	31320750	_NA_
YY1AP1	YY1 associated protein 1	HGNC:30935	Makes cells more sensitive to ferroptosis. Cells lacking YAP were no longer sensitised to ferroptosis.	Cell death, cell viability, lipid peroxidation, immunoblotting, CRISPR/Cas9, ChIP assay, qRT-PCR	Human, mice	Mouse embryonic fibroblasts, NF639 cells, human epithelial tumour cells, human mesothelioma cells, xenograft mouse	YAP :+: ACSL4, ACSL4 :+: Ferroptosis, YAP :+: TFRC, TFRC :+: Ferroptosis	Validated	_NA_	YY1-associated protein 1	Q9H869 (YYAP1_HUMAN)	31341276	YAP in article
EGLN2	Egl-9 family hypoxia inducible factor 2	HGNC:14660	Inhibiting EGLN2 activation diminished ferroptotic tumor cell death.	Cytotoxicity assays, western blot, immunoprecipitation, RNA interference, gene transfection, qPCR, MDA assay	Human, mice	Calu-1, THP1, HT1080, and HL-60 cells, athymic nude mice	EGLN2 :-: HIF1A, HIF1A :-: Lipid ROS, Lipid ROS :+: Ferroptosis	Validated	_NA_	Egl nine homolog 2	Q96KS0 (EGLN2_HUMAN)	31355331	_NA_
MIOX	Myo-inositol oxygenase	HGNC:14522	Overexpression exacerbates cell death, knockdown inhibits ferroptosis.	MTT assay, measurement of GPX4 activity, labile iron pool assay, evaluation of cell death and cell morphology, immunohistochemical staining	Human, mice	HK-2 cells, C57BL/6J mice	MIOX :-: GPX4, GPX4 :-: Ferroptosis, MIOX :-: GSH, GSH :-: Ferroptosis	Validated	_NA_	Inositol oxygenase	Q9UGB7 (MIOX_HUMAN)	31437128	_NA_
TAZ	Tafazzin	HGNC:11577	TAZ removal confers ferroptosis resistance, whereas overexpression of TAZS89A sensitizes cells to ferroptosis.	Cell viability, cell death, western blot, siRNA, qRT-PCR, microarray, immunofluorescence staining, ChIP-seq, Lipid ROS assay	Human, mice	RCC4, 786O cells, JAX NOD.CB17-PrkdcSCID-J mice	TAZ :+: EMP1, EMP1 :+: NOX4, NOX4 :+: Lipid ROS, Lipid ROS :+: Ferroptosis	Validated	_NA_	Tafazzin	Q16635 (TAZ_HUMAN)	31484063	_NA_
MTDH	Metadherin	HGNC:29608	Can enhance sensitivity to inducers of ferroptosis. Enhances the vulnerability of cancer cells to ferroptosis.	Cell viability, qRT-PCR, western blotting, GSH assay, GPx4 activity assay, tumor xenograft model	Human, mice	Cell lines A549, H1975, DMS53, DMS273, KLE, AN3CA, RL95, Hec1A, Ishikawa, MDA-MB-231, MCF-7, Hec50, immunodeficient mice	MTDH :-: Cysteine, Cystein :-: Ferroptosis, MTDH :-: SLC3A2, SLC3A2 :-: Ferroptosis, MTDH :-: GPX4, GPX4 :-: Ferroptosis, MTDH :-: GSH, GSH :-: Ferroptosis, MTDH :+: Glutamate, Glutamate :+: Ferroptosis	Validated	_NA_	Protein LYRIC	Q86UE4 (LYRIC_HUMAN)	31527591	_NA_
IDH1	Isocitrate dehydrogenase (NADP(+)) 1	HGNC:5382	Deletion of the mutant IDH1 allele or pharmacological inhibition of mutant IDH1 confers resistance to erastin-induced ferroptosis. Ectopic expression of mutant IDH1 promotes ferroptosis.	Cell transfection, cell viability, GSH assay, lipid ROS assay	Human	HEK293T, HT-1080 and KYSE-170 cells	IDH1 :-: GPX4, GPX4 :-: Lipid ROS, Lipid ROS :+: Ferroptosis, IDH1 :-: GSH, GSH :-: Ferroptosis	Validated	_NA_	Isocitrate dehydrogenase [NADP] cytoplasmic	O75874 (IDHC_HUMAN)	31591388	_NA_
SIRT1	Sirtuin 1	HGNC:14929	Knockout partially mitigates ferroptosis.	Lipid peroxidation, iron and GSH assay, qRT-PCR, western blot	Mice	Mice in C57BL/6 background	SIRT1 :+: Ferroptosis	Predicted	_NA_	NAD-dependent protein deacetylase sirtuin-1	Q96EB6 (SIR1_HUMAN)	31610175	_NA_
FBXW7	F-box and WD repeat domain containing 7	HGNC:16712	FBXW7 plasmid induces ferroptosis.	Cell viability, lipid peroxidation, iron, GSH and ROS assays, western blot, RT-PCR, RNA-seq	Human, mice	Hepatic stellate cells, C57BL/6 mice	FBXW7 :+: Ferroptosis	Deduced	_NA_	F-box/WD repeat-containing protein 7	Q969H0 (FBXW7_HUMAN)	31679460	_NA_
PANX1	Pannexin 1	HGNC:8599	Deletion protects against ferroptotic cell death. Silenced Panx1 expression significantly attenuated ferroptotic lipid peroxidation and iron accumulation induced by the ferroptosis inducer erastin.	Cell viability, cell death, qRT-PCR, western blot, lipid peroxidation detection, shRNA	Human, mice	HK-2 cells, C57BL/6 mice	PANX1 :-: HMOX1, HMOX1 :-: Ferroptosis, PANX1 :+: MAPK/ERK, MAPK/ERK :+: Ferroptinophagy, Ferroptinophagy :+: Ferroptosis	Validated	_NA_	Pannexin-1	Q96RD7 (PANX1_HUMAN)	31694915	_NA_
DNAJB6	DnaJ heat shock protein family (Hsp40) member B6	HGNC:14888	Promotes ferroptosis in esophageal squamous cell carcinoma.	Western blot, immunohistochemistry,lentivirus infection, colony-forming, RT‑qPCR, CCK-8, transwell and mouse xenograft assays	Human, mice	Cell lines TE-1, Eca9706, Eca109, KYSE150, and KYSE450, BALB/c athymic nude mice	DNAJB6 :-: GPX4, GPX4 :-: Ferroptosis	Predicted	_NA_	DnaJ homolog subfamily B member 6	O75190 (DNJB6_HUMAN)	31701262	_NA_
BACH1	BTB domain and CNC homolog 1	HGNC:935	Promotes ferroptosis by repressing the transcription of a subset of the erastin-induced protective genes.	Western blotting, qPCR, cell death, labile iron detection, RNA-seq	Mice	C57BL/6J mice, mouse embryonic fibroblasts	BACH1 :+: Lipid ROS, Lipid ROS :+: Ferroptosis	Validated	_NA_	Transcription regulator protein BACH1	O14867 (BACH1_HUMAN)	31740582	_NA_
LONP1	Lon peptidase 1, mitochondrial	HGNC:9479	Inhibition of LONP1 negatively regulates erastin-induced cell death.	Cell viability, western blot, qRT-PCR, lipid peroxidation assay, glutathione assay	Human	PANC1, BxPC3 cells	LONP1 :-: Nrf2/Keap1 pathway, Nrf2/Keap1 pathway :-: Ferroptosis, LONP1 :-: GPX4, GPX4 :-: Ferroptosis	Validated	_NA_	Lon protease homolog, mitochondrial	P36776 (LONM_HUMAN)	31822343	_NA_
PTGS2	Prostaglandin-endoperoxide synthase 2	HGNC:9605	Simply a downstream marker of ferroptosis. The most upregulated gene in BJeLR cells upon treatment with either erastin or (1S, 3R)-RSL3, but ferroptotic cell death was not affected by inhibition of the enzyme.	RT-qPCR, cell viability	Human	BJeLR cells	Validated	_NA_	Prostaglandin G/H synthase 2	P35354 (PGH2_HUMAN)	24439385	May promote ferroptosis.
DUSP1	Dual specificity phosphatase 1	HGNC:3064	Expression was upregulated during ferroptosis induced by erastin or RSL3.	RT-qPCR, cell viability	Human	BJeLR cells	Deduced	Inferred as ferroptotic marker because of change (|delta ct| > 2) in gene expression.	Dual specificity protein phosphatase 1	P28562 (DUS1_HUMAN)	24439385	May promote ferroptosis.
NOS2	Nitric oxide synthase 2	HGNC:7873	Expression was upregulated during ferroptosis induced by erastin or RSL3.	RT-qPCR, cell viability	Human	BJeLR cells	Deduced	Inferred as ferroptotic marker because of change (|delta ct| > 2) in gene expression.	Nitric oxide synthase	P35228 (NOS2_HUMAN)	24439385	May promote ferroptosis.
NCF2	Neutrophil cytosolic factor 2	HGNC:7661	Expression was upregulated during ferroptosis induced by erastin or RSL3.	RT-qPCR, cell viability	Human	BJeLR cells	Deduced	Inferred as ferroptotic marker because of change (|delta ct| > 2) in gene expression.	Neutrophil cytosol factor 2	P19878 (NCF2_HUMAN)	24439385	May promote ferroptosis.
MT3	Metallothionein 3	HGNC:7408	Expression was upregulated during ferroptosis induced by erastin or RSL3.	RT-qPCR, cell viability	Human	BJeLR cells	Deduced	Inferred as ferroptotic marker because of change (|delta ct| > 2) in gene expression.	Metallothionein-3	P25713 (MT3_HUMAN)	24439385	May promote ferroptosis.
UBC	Ubiquitin C	HGNC:12468	Expression was upregulated during ferroptosis induced by erastin or RSL3.	RT-qPCR, cell viability	Human	BJeLR cells	Deduced	Inferred as ferroptotic marker because of change (|delta ct| > 2) in gene expression.	Polyubiquitin-C	P0CG48 (UBC_HUMAN)	24439385	May promote ferroptosis.
ALB	Albumin	HGNC:399	Expression was upregulated during ferroptosis induced by erastin or RSL3.	RT-qPCR, cell viability	Human	BJeLR cells	Deduced	Inferred as ferroptotic marker because of change (|delta ct| > 2) in gene expression.	Serum albumin	P02768 (ALBU_HUMAN)	24439385	May promote ferroptosis.
TXNRD1	Thioredoxin reductase 1	HGNC:12437	Expression was upregulated during ferroptosis induced by erastin or RSL3.	RT-qPCR, cell viability	Human	BJeLR cells	Deduced	Inferred as ferroptotic marker because of change (|delta ct| > 2) in gene expression.	Thioredoxin reductase 1	Q16881 (TRXR1_HUMAN)	24439385	May promote ferroptosis.
SRXN1	Sulfiredoxin 1	HGNC:16132	Expression was upregulated during ferroptosis induced by erastin or RSL3.	RT-qPCR, cell viability	Human	BJeLR cells	Deduced	Inferred as ferroptotic marker because of change (|delta ct| > 2) in gene expression.	Sulfiredoxin-1	Q9BYN0 (SRXN1_HUMAN)	24439385	May promote ferroptosis.
GPX2	Glutathione peroxidase 2	HGNC:4554	Expression was upregulated during ferroptosis induced by erastin or RSL3.	RT-qPCR, cell viability	Human	BJeLR cells	Deduced	Inferred as ferroptotic marker because of change (|delta ct| > 2) in gene expression.	Glutathione peroxidase 2	P18283 (GPX2_HUMAN)	24439385	May promote ferroptosis.
BNIP3	BCL2 interacting protein 3	HGNC:1084	Expression was upregulated during ferroptosis induced by erastin or RSL3.	RT-qPCR, cell viability	Human	BJeLR cells	Deduced	Inferred as ferroptotic marker because of change (|delta ct| > 2) in gene expression.	BCL2/adenovirus E1B 19 kDa protein-interacting protein 3	Q12983 (BNIP3_HUMAN)	24439385	May promote ferroptosis.
OXSR1	Oxidative stress responsive kinase 1	HGNC:8508	Expression was upregulated during ferroptosis induced by erastin or RSL3.	RT-qPCR, cell viability	Human	BJeLR cells	Deduced	Inferred as ferroptotic marker because of change (|delta ct| > 2) in gene expression.	Serine/threonine-protein kinase OSR1	O95747 (OXSR1_HUMAN)	24439385	May promote ferroptosis.
SELENOS	Selenoprotein S	HGNC:30396	Expression was upregulated during ferroptosis induced by erastin or RSL3.	RT-qPCR, cell viability	Human	BJeLR cells	Deduced	Inferred as ferroptotic marker because of change (|delta ct| > 2) in gene expression.	Selenoprotein S	Q9BQE4 (SELS_HUMAN)	24439385	SELS in article. May promote ferroptosis.
ANGPTL7	Angiopoietin like 7	HGNC:24078	Expression was downregulated during ferroptosis induced by erastin or RSL3.	RT-qPCR, cell viability	Human	BJeLR cells	Deduced	Inferred as ferroptotic marker because of change (|delta ct| > 2) in gene expression.	Angiopoietin-related protein 7	O43827 (ANGL7_HUMAN)	24439385	May promote ferroptosis.
SLC7A11	Solute carrier family 7 member 11	HGNC:11059	Similar to erastin treatment, silencing of this gene inhibits glutamate release. Erastin specifically inhibits SLC7A11-dependent system Xc- function.	RNA silencing, RT-qPCR	Human	HT-1080 cells	Deduced	Further study needed to confirm connection to ferroptosis.	Cystine/glutamate transporter	Q9UPY5 (XCT_HUMAN)	24844246	May inhibit ferroptosis.
DDIT4	DNA damage inducible transcript 4	HGNC:24944	Up-regulated (>= 2 fold) in erastin-treated samples.	RNA-seq	Human	HT-1080 cells	Screened	Further study needed to confirm connection to ferroptosis.	DNA damage-inducible transcript 4 protein	Q9NX09 (DDIT4_HUMAN)	24844246	May promote ferroptosis.
LOC284561	_NA_	_NA_	Up-regulated (>= 2 fold) in erastin-treated samples.	RNA-seq	Human	HT-1080 cells	Screened	Further study needed to confirm connection to ferroptosis.	_NA_	_NA_	24844246	Not found in HGNC. May promote ferroptosis.
ASNS	Asparagine synthetase (glutamine-hydrolyzing)	HGNC:753	Up-regulated (>= 2 fold) in erastin-treated samples.	RNA-seq	Human	HT-1080 cells	Screened	Further study needed to confirm connection to ferroptosis.	Asparagine synthetase [glutamine-hydrolyzing]	P08243 (ASNS_HUMAN)	24844246	May promote ferroptosis.
TSC22D3	TSC22 domain family member 3	HGNC:3051	Up-regulated (>= 2 fold) in erastin-treated samples.	RNA-seq	Human	HT-1080 cells	Screened	Further study needed to confirm connection to ferroptosis.	TSC22 domain family protein 3	Q99576 (T22D3_HUMAN)	24844246	May promote ferroptosis.
DDIT3	DNA damage inducible transcript 3	HGNC:2726	Up-regulated (>= 2 fold) in erastin-treated samples.	RNA-seq	Human	HT-1080 cells	Screened	Further study needed to confirm connection to ferroptosis.	DDIT3 upstream open reading frame protein	P0DPQ6 (DT3UO_HUMAN)	24844246	May promote ferroptosis.
JDP2	Jun dimerization protein 2	HGNC:17546	Up-regulated (>= 2 fold) in erastin-treated samples.	RNA-seq	Human	HT-1080 cells	Screened	Further study needed to confirm connection to ferroptosis.	Jun dimerization protein 2	Q8WYK2 (JDP2_HUMAN)	24844246	May promote ferroptosis.
SESN2	Sestrin 2	HGNC:20746	Up-regulated (>= 2 fold) in erastin-treated samples.	RNA-seq	Human	HT-1080 cells	Screened	Further study needed to confirm connection to ferroptosis.	Sestrin-2	P58004 (SESN2_HUMAN)	24844246	May promote ferroptosis.
SLC1A4	Solute carrier family 1 member 4	HGNC:10942	Up-regulated (>= 2 fold) in erastin-treated samples.	RNA-seq	Human	HT-1080 cells	Screened	Further study needed to confirm connection to ferroptosis.	Neutral amino acid transporter A	P43007 (SATT_HUMAN)	24844246	May promote ferroptosis.
PCK2	Phosphoenolpyruvate carboxykinase 2, mitochondrial	HGNC:8725	Up-regulated (>= 2 fold) in erastin-treated samples.	RNA-seq	Human	HT-1080 cells	Screened	Further study needed to confirm connection to ferroptosis.	Phosphoenolpyruvate carboxykinase [GTP]	Q16822 (PCKGM_HUMAN)	24844246	May promote ferroptosis.
TXNIP	Thioredoxin interacting protein	HGNC:16952	Up-regulated (>= 2 fold) in erastin-treated samples.	RNA-seq	Human	HT-1080 cells	Screened	Further study needed to confirm connection to ferroptosis.	Thioredoxin-interacting protein	Q9H3M7 (TXNIP_HUMAN)	24844246	May promote ferroptosis.
VLDLR	Very low density lipoprotein receptor	HGNC:12698	Up-regulated (>= 2 fold) in erastin-treated samples.	RNA-seq	Human	HT-1080 cells	Screened	Further study needed to confirm connection to ferroptosis.	Very low-density lipoprotein receptor	P98155 (VLDLR_HUMAN)	24844246	May promote ferroptosis.
GPT2	Glutamic--pyruvic transaminase 2	HGNC:18062	Up-regulated (>= 2 fold) in erastin-treated samples.	RNA-seq	Human	HT-1080 cells	Screened	Further study needed to confirm connection to ferroptosis.	Alanine aminotransferase 2	Q8TD30 (ALAT2_HUMAN)	24844246	May promote ferroptosis.
PSAT1	Phosphoserine aminotransferase 1	HGNC:19129	Up-regulated (>= 2 fold) in erastin-treated samples.	RNA-seq	Human	HT-1080 cells	Screened	Further study needed to confirm connection to ferroptosis.	Phosphoserine aminotransferase	Q9Y617 (SERC_HUMAN)	24844246	May promote ferroptosis.
LURAP1L	Leucine rich adaptor protein 1 like	HGNC:31452	Up-regulated (>= 2 fold) in erastin-treated samples.	RNA-seq	Human	HT-1080 cells	Screened	Further study needed to confirm connection to ferroptosis.	Leucine rich adaptor protein 1-like	Q8IV03 (LUR1L_HUMAN)	24844246	C9ORF150 in article. May promote ferroptosis.
SLC7A5	Solute carrier family 7 member 5	HGNC:11063	Up-regulated (>= 2 fold) in erastin-treated samples.	RNA-seq	Human	HT-1080 cells	Screened	Further study needed to confirm connection to ferroptosis.	Large neutral amino acids transporter small subunit 1	Q01650 (LAT1_HUMAN)	24844246	May promote ferroptosis.
HERPUD1	Homocysteine inducible ER protein with ubiquitin like domain 1	HGNC:13744	Up-regulated (>= 2 fold) in erastin-treated samples.	RNA-seq	Human	HT-1080 cells	Screened	Further study needed to confirm connection to ferroptosis.	Homocysteine-responsive endoplasmic reticulum-resident ubiquitin-like domain member 1 protein	Q15011 (HERP1_HUMAN)	24844246	May promote ferroptosis.
XBP1	X-box binding protein 1	HGNC:12801	Up-regulated (>= 2 fold) in erastin-treated samples.	RNA-seq	Human	HT-1080 cells	Screened	Further study needed to confirm connection to ferroptosis.	X-box-binding protein 1	P17861 (XBP1_HUMAN)	24844246	May promote ferroptosis.
SLC3A2	Solute carrier family 3 member 2	HGNC:11026	Up-regulated (>= 2 fold) in erastin-treated samples.	RNA-seq	Human	HT-1080 cells	Screened	Further study needed to confirm connection to ferroptosis.	4F2 cell-surface antigen heavy chain	P08195 (4F2_HUMAN)	24844246	May promote ferroptosis.
CBS	Cystathionine beta-synthase	HGNC:1550	Up-regulated (>= 2 fold) in erastin-treated samples.	RNA-seq	Human	HT-1080 cells	Screened	Further study needed to confirm connection to ferroptosis.	Cystathionine beta-synthase	P35520 (CBS_HUMAN)	24844246	May promote ferroptosis.
ATF4	Activating transcription factor 4	HGNC:786	Up-regulated (>= 2 fold) in erastin-treated samples.	RNA-seq	Human	HT-1080 cells	Screened	Further study needed to confirm connection to ferroptosis.	Cyclic AMP-dependent transcription factor ATF-4	P18848 (ATF4_HUMAN)	24844246	May promote ferroptosis.
ZNF419	Zinc finger protein 419	HGNC:20648	Up-regulated (>= 2 fold) in erastin-treated samples.	RNA-seq	Human	HT-1080 cells	Screened	Further study needed to confirm connection to ferroptosis.	Zinc finger protein 419	Q96HQ0 (ZN419_HUMAN)	24844246	May promote ferroptosis.
KLHL24	Kelch like family member 24	HGNC:25947	Up-regulated (>= 2 fold) in erastin-treated samples.	RNA-seq	Human	HT-1080 cells	Screened	Further study needed to confirm connection to ferroptosis.	Kelch-like protein 24	Q6TFL4 (KLH24_HUMAN)	24844246	May promote ferroptosis.
TRIB3	Tribbles pseudokinase 3	HGNC:16228	Up-regulated (>= 2 fold) in erastin-treated samples.	RNA-seq	Human	HT-1080 cells	Screened	Further study needed to confirm connection to ferroptosis.	Tribbles homolog 3	Q96RU7 (TRIB3_HUMAN)	24844246	May promote ferroptosis.
ZFP69B	ZFP69 zinc finger protein B	HGNC:28053	Up-regulated (>= 2 fold) in erastin-treated samples.	RNA-seq	Human	HT-1080 cells	Screened	Further study needed to confirm connection to ferroptosis.	Zinc finger protein 69 homolog B	Q9UJL9 (ZF69B_HUMAN)	24844246	ZNF643 in article. May promote ferroptosis.
ATP6V1G2	ATPase H+ transporting V1 subunit G2	HGNC:862	Up-regulated (>= 2 fold) in erastin-treated samples.	RNA-seq	Human	HT-1080 cells	Screened	Further study needed to confirm connection to ferroptosis.	V-type proton ATPase subunit G 2	O95670 (VATG2_HUMAN)	24844246	May promote ferroptosis.
VEGFA	Vascular endothelial growth factor A	HGNC:12680	Up-regulated (>= 2 fold) in erastin-treated samples.	RNA-seq	Human	HT-1080 cells	Screened	Further study needed to confirm connection to ferroptosis.	Vascular endothelial growth factor A	P15692 (VEGFA_HUMAN)	24844246	May promote ferroptosis.
GDF15	Growth differentiation factor 15	HGNC:30142	Up-regulated (>= 2 fold) in erastin-treated samples.	RNA-seq	Human	HT-1080 cells	Screened	Further study needed to confirm connection to ferroptosis.	Growth/differentiation factor 15	Q99988 (GDF15_HUMAN)	24844246	May promote ferroptosis.
TUBE1	Tubulin epsilon 1	HGNC:20775	Up-regulated (>= 2 fold) in erastin-treated samples.	RNA-seq	Human	HT-1080 cells	Screened	Further study needed to confirm connection to ferroptosis.	Tubulin epsilon chain	Q9UJT0 (TBE_HUMAN)	24844246	May promote ferroptosis.
ARRDC3	Arrestin domain containing 3	HGNC:29263	Up-regulated (>= 2 fold) in erastin-treated samples.	RNA-seq	Human	HT-1080 cells	Screened	Further study needed to confirm connection to ferroptosis.	Arrestin domain-containing protein 3	Q96B67 (ARRD3_HUMAN)	24844246	May promote ferroptosis.
CEBPG	CCAAT enhancer binding protein gamma	HGNC:1837	Up-regulated (>= 2 fold) in erastin-treated samples.	RNA-seq	Human	HT-1080 cells	Screened	Further study needed to confirm connection to ferroptosis.	CCAAT/enhancer-binding protein gamma	P53567 (CEBPG_HUMAN)	24844246	May promote ferroptosis.
SNORA16A	Small nucleolar RNA, H/ACA box 16A	HGNC:32605	Down-regulated (>= 2 fold) in erastin-treated samples.	RNA-seq	Human	HT-1080 cells	Screened	Further study needed to confirm connection to ferroptosis.	_NA_	_NA_	24844246	May inhibit ferroptosis.
RGS4	Regulator of G protein signaling 4	HGNC:10000	Down-regulated (>= 2 fold) in erastin-treated samples.	RNA-seq	Human	HT-1080 cells	Screened	Further study needed to confirm connection to ferroptosis.	Regulator of G-protein signaling 4	P49798 (RGS4_HUMAN)	24844246	May inhibit ferroptosis.
BLOC1S5-TXNDC5	BLOC1S5-TXNDC5 readthrough (NMD candidate)	HGNC:42001	Down-regulated (>= 2 fold) in erastin-treated samples.	RNA-seq	Human	HT-1080 cells	Screened	Further study needed to confirm connection to ferroptosis.	_NA_	_NA_	24844246	MUTED-TXNDC5 in article. May inhibit ferroptosis.
LOC390705	_NA_	_NA_	Down-regulated (>= 2 fold) in erastin-treated samples.	RNA-seq	Human	HT-1080 cells	Screened	Further study needed to confirm connection to ferroptosis.	_NA_	_NA_	24844246	Not found in HGNC. May inhibit ferroptosis.
EIF2S1	Eukaryotic translation initiation factor 2 subunit 1	HGNC:3265	Phosphorylated in erastin-treated sample.	Western blot	Human	HT-1080 cells	Deduced	_NA_	Eukaryotic translation initiation factor 2 subunit 1	P05198 (IF2A_HUMAN)	24844246	eIF2alpha in article. May promote ferroptosis.
KIM-1	Kidney injury molecule-1	_NA_	Down-regulated upon Fer-1 appearance	Real-time quantitative RT-PCR	Mice	Fer-1–treated CaOx model	Deduced	_NA_	_NA_	_NA_	25385600	Not found in HGNC. May promote ferroptosis.
IL6	Interleukin 6	HGNC:6018	Down-regulated upon Fer-1 appearance	Real-time quantitative RT-PCR	Mice	Fer-1–treated CaOx model	Deduced	_NA_	Interleukin-6	P05231 (IL6_HUMAN)	25385600	IL-6 in article. May promote ferroptosis.
CXCL2	C-X-C motif chemokine ligand 2	HGNC:4603	Down-regulated upon Fer-1 appearance	Real-time quantitative RT-PCR	Mice	Fer-1–treated CaOx model	Deduced	_NA_	C-X-C motif chemokine 2	P19875 (CXCL2_HUMAN)	25385600	May promote ferroptosis.
RELA	RELA proto-oncogene, NF-kB subunit	HGNC:9955	Down-regulated upon Fer-1 appearance	Real-time quantitative RT-PCR	Mice	Fer-1–treated CaOx model	Deduced	_NA_	Transcription factor p65	Q04206 (TF65_HUMAN)	25385600	p65 in article. May promote ferroptosis.
HSD17B11	Hydroxysteroid 17-beta dehydrogenase 11	HGNC:22960	Enriched in RSL3-resistant cells.	Gene trap insertion	Human	Chronic myeloid leukemia cell line KBM7	Screened	_NA_	Estradiol 17-beta-dehydrogenase 11	Q8NBQ5 (DHB11_HUMAN)	25965523	May promote ferroptosis.
AGPAT3	1-acylglycerol-3-phosphate O-acyltransferase 3	HGNC:326	Enriched in RSL3-resistant cells.	Gene trap insertion	Human	Chronic myeloid leukemia cell line KBM7	Screened	_NA_	1-acyl-sn-glycerol-3-phosphate acyltransferase gamma	Q9NRZ7 (PLCC_HUMAN)	25965523	May promote ferroptosis.
SETD1B	SET domain containing 1B, histone lysine methyltransferase	HGNC:29187	Enriched in GPX4 inhibitor ML162-resistant cells.	Gene trap insertion	Human	Chronic myeloid leukemia cell line KBM7	Screened	_NA_	Histone-lysine N-methyltransferase SETD1B	Q9UPS6 (SET1B_HUMAN)	25965523	May promote ferroptosis.
FTL	Ferritin light chain	HGNC:3999	Its expression is decreased in patients.	Gene expression analysis	Human	Patient PDAC tissues	Deduced	_NA_	Ferritin light chain	P02792 (FRIL_HUMAN)	26097885	May promote ferroptosis.
MAFG	MAF bZIP transcription factor G	HGNC:6781	The interaction between NRF2 and MafG was increased in response to erastin and sorafenib.	Western blot	Human, mice	HepG2, Hepa1‐6, Hep3B, and SNU‐182 cells	Deduced	_NA_	Transcription factor MafG	O15525 (MAFG_HUMAN)	26403645	May inhibit ferroptosis.
IL33	Interleukin 33	HGNC:16028	IL-33 upregulation is a feature of ferroptosis. Ferrostatin-1, an inhibitor of ferroptosis, prevented the upregulation of IL-33.	Western blot, quantitative PCR, ELISA	Mice	C57BL/6 mice	Deduced	_NA_	Interleukin-33	O95760 (IL33_HUMAN)	27352622	IL-33 in article. May promote ferroptosis.
FTH1	Ferritin heavy chain 1	HGNC:3976	An increase of endogenous FTH1 level during ferroptosis. Degradation of FTH1 protein upon ferroptosis induction.	Immunoblotting, q-PCR	Human	HT1080 cells	Validated	An error may exist in the original article, where the authors wrote "ferritin light chain 1 (FTH1)". According to HGNC, FTH1 is the official symbol for "ferritin heavy chain 1".	Ferritin heavy chain	P02794 (FRIH_HUMAN)	27514700	_NA_
SLC40A1	Solute carrier family 40 member 1	HGNC:10909	Erastin-induced mRNA expression is upregulated in FANCD2-deficient cells.	Q-PCR	Mice	Bone marrow stromal cells	Validated	Used as a marker in this study but has been proved to be a suppressor (PMID 27441659).	Solute carrier family 40 member 1	Q9NP59 (S40A1_HUMAN)	27773819	May promote ferroptosis.
GPX4	Glutathione peroxidase 4	HGNC:4556	Erastin-induced mRNA expression is downregulated in FANCD2-deficient cells.	Q-PCR, western blot	Mice	Bone marrow stromal cells	Validated	Used as a marker in this study but has been proved to be a suppressor (PMID 25824823).	Phospholipid hydroperoxide glutathione peroxidase	P36969 (GPX4_HUMAN)	27773819	May inhibit ferroptosis.
HAMP	Hepcidin antimicrobial peptide	HGNC:15598	Erastin-induced mRNA expression is downregulated in FANCD2-deficient cells.	Q-PCR	Mice	Bone marrow stromal cells	Deduced	_NA_	Hepcidin	P81172 (HEPC_HUMAN)	27773819	May inhibit ferroptosis.
HSPB1	Heat shock protein family B (small) member 1	HGNC:5246	Erastin-induced mRNA expression is downregulated in FANCD2-deficient cells.	Q-PCR	Mice	Bone marrow stromal cells	Validated	Used as a marker in this study but has been proved to be a suppressor (PMID 25728673).	Heat shock protein beta-1	P04792 (HSPB1_HUMAN)	27773819	May inhibit ferroptosis.
NFE2L2	Nuclear factor, erythroid 2 like 2	HGNC:7782	Erastin-induced mRNA expression is downregulated in FANCD2-deficient cells.	Q-PCR	Mice	Bone marrow stromal cells	Validated	Used as a marker in this study but has been proved to be a suppressor (PMID 27015352).	Nuclear factor erythroid 2-related factor 2	Q16236 (NF2L2_HUMAN)	27773819	NRF2 in article. May inhibit ferroptosis.
STEAP3	STEAP3 metalloreductase	HGNC:24592	Erastin-induced mRNA expression is downregulated in FANCD2-deficient cells.	Q-PCR	Mice	Bone marrow stromal cells	Deduced	_NA_	Metalloreductase STEAP3	Q658P3 (STEA3_HUMAN)	27773819	May inhibit ferroptosis.
DRD5	Dopamine receptor D5	HGNC:3026	Ferroptotic erastin induces DRD5 gene expression in ferroptosis.	Western blot, Q-PCR	Human	PANC1 cells	Deduced	_NA_	D(1B) dopamine receptor	P21918 (DRD5_HUMAN)	27793671	May promote ferroptosis.
DRD4	Dopamine receptor D4	HGNC:3025	Antiferroptotic dopamine suppressed dopamine receptor D4 protein degradation. Ferroptotic erastin promotes DRD4 protein degradation.	Western blot, Q-PCR	Human	PANC1 cells	Deduced	_NA_	D(4) dopamine receptor	P21917 (DRD4_HUMAN)	27793671	May inhibit ferroptosis.
MAP3K5	Mitogen-activated protein kinase kinase kinase 5	HGNC:6857	Cold stress evokes ferroptosis, and the ASK1‐p38 pathway is activated downstream of lipid peroxide, leading to the cell death. ASK1‐p38 axis is also activated in the erastin‐induced ferroptosis model.	LDH assay, immunoblot, RNAi, CCK-8	Human	A549 cells	Deduced	_NA_	Mitogen-activated protein kinase kinase kinase 5	Q99683 (M3K5_HUMAN)	28887319	ASK1 in article. May promote ferroptosis.
SLC2A1	Solute carrier family 2 member 1	HGNC:11005	Increased at LSH overexpression. Decreased at LSH knockdown. LSH can inhibit ferroptosis.	ChIP analysis, RT-qPCR	Human	H358, A549 cells	Deduced	_NA_	Solute carrier family 2	P11166 (GTR1_HUMAN)	28900510	GLUT1 in article. May inhibit ferroptosis.
SLC2A3	Solute carrier family 2 member 3	HGNC:11007	Decreased at LSH knockdown. LSH can inhibit ferroptosis.	RT-qPCR	Human	H358, A549 cells	Deduced	_NA_	Solute carrier family 2	P11169 (GTR3_HUMAN)	28900510	GLUT3 in article. May inhibit ferroptosis.
SLC2A6	Solute carrier family 2 member 6	HGNC:11011	Increased at LSH overexpression. Decreased at LSH knockdown. LSH can inhibit ferroptosis.	RT-qPCR	Human	H358, A549 cells	Deduced	_NA_	Solute carrier family 2	Q9UGQ3 (GTR6_HUMAN)	28900511	GLUT6 in article. May inhibit ferroptosis.
SLC2A8	Solute carrier family 2 member 8	HGNC:13812	Decreased at LSH knockdown. LSH can inhibit ferroptosis.	RT-qPCR	Human	H358, A549 cells	Deduced	_NA_	Solute carrier family 2	Q9NY64 (GTR8_HUMAN)	28900512	GLUT8 in article. May inhibit ferroptosis.
SLC2A12	Solute carrier family 2 member 12	HGNC:18067	Increased at LSH overexpression. Decreased at LSH knockdown. LSH can inhibit ferroptosis.	RT-qPCR	Human	H358, A549 cells	Deduced	_NA_	Solute carrier family 2	Q8TD20 (GTR12_HUMAN)	28900513	GLUT12 in article. May inhibit ferroptosis.
GLUT13	_NA_	_NA_	Increased at LSH overexpression. Decreased at LSH knockdown. LSH can inhibit ferroptosis.	RT-qPCR	Human	H358, A549 cells	Deduced	_NA_	_NA_	_NA_	28900514	Not found in HGNC. May inhibit ferroptosis.
SLC2A14	Solute carrier family 2 member 14	HGNC:18301	Decreased at LSH knockdown. LSH can inhibit ferroptosis.	RT-qPCR	Human	H358, A549 cells	Deduced	_NA_	Solute carrier family 2	Q8TDB8 (GTR14_HUMAN)	28900515	GLUT14 in article. May inhibit ferroptosis.
EIF2AK4	Eukaryotic translation initiation factor 2 alpha kinase 4	HGNC:19687	CHAC1 degradation of GSH enhances cystine-starvation-induced ferroptosis through the activated GCN2-eIF2 alpha-ATF4 pathway.	Western blot, real-time PCR, cell viability assay, siRNA, GSH assay kit	Human	MDA-MB-231, Hs 578T, and HCC 1937 cells	Deduced	_NA_	eIF-2-alpha kinase GCN2	Q9P2K8 (E2AK4_HUMAN)	29383104	GCN2 in article. May promote ferroptosis.
TFAP2C	Transcription factor AP-2 gamma	HGNC:11744	Activated by ferroptosis inhibitor selenium.	Behavioral analysis, infarct volume analysis, immunocytochemistry, TUNEL staining, fluoro-jade Staining, qRT-PCR, cell death assay, ChIP assay, siRNA, western blot, immunoblotting, RNA-seq, mass spectrometry	Mice	C57BL/6 mice, primary cortical neurons, HT22 murine hippocampal cells	Deduced	_NA_	Transcription factor AP-2 gamma	Q92754 (AP2C_HUMAN)	31056284	May inhibit ferroptosis.
SP1	Sp1 transcription factor	HGNC:11205	Activated by ferroptosis inhibitor selenium.	Behavioral analysis, infarct volume analysis, immunocytochemistry, TUNEL staining, fluoro-jade Staining, qRT-PCR, cell death assay, ChIP assay, siRNA, western blot, immunoblotting, RNA-seq, mass spectrometry	Mice	C57BL/6 mice, primary cortical neurons, HT22 murine hippocampal cells	Deduced	_NA_	Transcription factor Sp1	P08047 (SP1_HUMAN)	31056284	May inhibit ferroptosis.
HBA1	Hemoglobin subunit alpha 1	HGNC:4823	Upregulated in cells treated with ferroptosis inducer erastin. Stimulates ferroptosis possibly in a GSH-dependent manner.	Tandem mass tags, RNA-seq, DNase-seq, qPCR, Western blot, IHC	Human	HepG2, Bel-7402 cells	Deduced	_NA_	Hemoglobin subunit alpha	P69905 (HBA_HUMAN)	31108460	May promote ferroptosis.
NNMT	Nicotinamide N-methyltransferase	HGNC:7861	Upregulated in cells treated with ferroptosis inducer erastin. Stimulates ferroptosis possibly in a GSH-dependent manner.	Tandem mass tags, RNA-seq, DNase-seq, qPCR, Western blot, IHC	Human	HepG2, Bel-7402 cells	Deduced	_NA_	Nicotinamide N-methyltransferase	P40261 (NNMT_HUMAN)	31108460	May promote ferroptosis.
PLIN4	Perilipin 4	HGNC:29393	Upregulated in cells treated with ferroptosis inducer erastin. Stimulates ferroptosis possibly in a GSH-dependent manner.	Tandem mass tags, RNA-seq, DNase-seq, qPCR, Western blot, IHC	Human	HepG2, Bel-7402 cells	Deduced	_NA_	Perilipin-4	Q96Q06 (PLIN4_HUMAN)	31108460	May promote ferroptosis.
HIC1	HIC ZBTB transcriptional repressor 1	HGNC:4909	Essential for stimulation of pro-ferroptotic gene transcription upon ferroptosis induction.	Immunohistochemistry, immunofluorescence, western blot, qPCR, metabolites examination, ChIP	Human	HepG2, Bel-7402 cells	Deduced	_NA_	Hypermethylated in cancer 1 protein	Q14526 (HIC1_HUMAN)	31108460	May promote ferroptosis.
STMN1	Stathmin 1	HGNC:6510	Downregulated in cells treated with ferroptosis inducer erastin. Suppresses ferroptosis possibly in a GSH-dependent manner.	Tandem mass tags, RNA-seq, DNase-seq, qPCR, Western blot, IHC	Human	HepG2, Bel-7402 cells	Deduced	_NA_	Stathmin	P16949 (STMN1_HUMAN)	31108460	May inhibit ferroptosis.
RRM2	Ribonucleotide reductase regulatory subunit M2	HGNC:10452	Downregulated in cells treated with ferroptosis inducer erastin. Suppresses ferroptosis possibly in a GSH-dependent manner.	Tandem mass tags, RNA-seq, DNase-seq, qPCR, Western blot, IHC	Human	HepG2, Bel-7402 cells	Deduced	_NA_	Ribonucleoside-diphosphate reductase subunit M2	P31350 (RIR2_HUMAN)	31108460	May inhibit ferroptosis.
CAPG	Capping actin protein, gelsolin like	HGNC:1474	Downregulated in cells treated with ferroptosis inducer erastin. Suppresses ferroptosis possibly in a GSH-dependent manner.	Tandem mass tags, RNA-seq, DNase-seq, qPCR, Western blot, IHC	Human	HepG2, Bel-7402 cells	Deduced	_NA_	Macrophage-capping protein	P40121 (CAPG_HUMAN)	31108460	May inhibit ferroptosis.
HNF4A	Hepatocyte nuclear factor 4 alpha	HGNC:5024	Essential for stimulation of anti-ferroptotic gene transcription.	Immunohistochemistry, immunofluorescence, western blot, qPCR, metabolites examination, ChIP	Human	HepG2, Bel-7402 cells	Deduced	_NA_	Hepatocyte nuclear factor 4-alpha	P41235 (HNF4A_HUMAN)	31108460	May inhibit ferroptosis.
NGB	Neuroglobin	HGNC:14077	Human neuroglobin (hNgb)-EGFP-expressing SH-SY5Y cells to be significantly more resistant to ferroptosis induction.	Cell death, cell viability, lipid peroxidation assay, RT-qPCR	Human	SH-SY5Y cells	Deduced	_NA_	Neuroglobin	Q9NPG2 (NGB_HUMAN)	31405213	May inhibit ferroptosis.
YWHAE	Tyrosine 3-monooxygenase/tryptophan 5-monooxygenase activation protein epsilon	HGNC:12851	Required by RSL3 (a ferroptosis inducer) to inactivate GPX4 (a ferroptosis inhibitor).	Mass spectrometry, siRNA, western blot	Human	HEK293T cells	Deduced	_NA_	14-3-3 protein epsilon	P62258 (1433E_HUMAN)	31581313	14-3-3epsilon in article. May promote ferroptosis.
GABPB1	GA binding protein transcription factor subunit beta 1	HGNC:4074	Downregulated by lncRNA GABPB1-AS1 upon erastin treatment.	RT-qPCR, western blot, siRNA, cell viability, lipid peroxidation assay	Human	HepG2, Huh7, and Hep3B cells	Deduced	_NA_	GA-binding protein subunit beta-1	Q06547 (GABP1_HUMAN)	31700067	May inhibit ferroptosis.
AURKA	Aurora kinase A	HGNC:11393	Inhibition of AURKA or reconstitution of miR-4715-3p inhibited GPX4 and induced cell death, suggesting a link between AURKA and ferroptosis.	qRT-PCR, western blot, lentiviral infection, CellTiter-Glo luminescence assay	Human	OE33, STKM2, MKN45 cells	Predicted	_NA_	Aurora kinase A	O14965 (AURKA_HUMAN)	31740746	May inhibit ferroptosis.
MIR4715	microRNA 4715	HGNC:41666	Inhibition of AURKA or reconstitution of miR-4715-3p inhibited GPX4 and induced cell death, suggesting a link between AURKA and ferroptosis.	qRT-PCR, western blot, lentiviral infection, CellTiter-Glo luminescence assay	Human	OE33, STKM2, MKN45 cells	Predicted	_NA_	_NA_	_NA_	31740746	miR-4715-3p in article. May promote ferroptosis.
RIPK1	Receptor interacting serine/threonine kinase 1	HGNC:10019	Reduced expression results in resistance to ferroptosis.	Cell viability, western blot, RNA-seq, GSH assay, qRT-PCR, immunofluorescence imaging	Human	Patient-derived fibroblasts	Deduced	_NA_	Receptor-interacting serine/threonine-protein kinase 1	Q13546 (RIPK1_HUMAN)	31827280	May promote ferroptosis.
PRDX1	Peroxiredoxin 1	HGNC:9352	Necessary to ferroptosis-related lipid peroxidation.	Western blot, siRNA, flow cytometry, cell viability, RT-PCR	Human	Primary corneal endothelial cells, B4G12 and HT1080 cells	Deduced	_NA_	Peroxiredoxin-1	Q06830 (PRDX1_HUMAN)	31901729	May promote ferroptosis.
MIR30B	microRNA 30b	HGNC:31625	Upregulation of miR-30b-5p in preeclampsia models plays a pivotal role in ferroptosis.	GSH assay, MDA measurement, western blot, immunohistochemistry, microarray, RT-qPCR, labile iron assay, cell viability, LDH assay	Human, rat	Trophoblasts, preeclampsia model, HTR-8/SVneo and TEV-1 cells	Deduced	_NA_	_NA_	_NA_	31926626	miR-30b-5p in article. May promote ferroptosis.
AKR1C1	Aldo-keto reductase family 1 member C1	HGNC:384	Up-regulated in DU-145 erastin-resistant clones. Participate in the detoxification of toxic lipid metabolites. May confer partial resistance to erastin by enhancing the detoxification of reactive aldehydes generated downstream of the oxidative destruction of the plasma membrane during ferroptosis.	RNA-seq, glutamate release assay, cell growth, flow cytometry	Human	DU-145 prostate cancer cells	AKR1C1 :-: Ferroptosis	Validated	_NA_	Aldo-keto reductase family 1 member C1	Q04828 (AK1C1_HUMAN)	24844246	_NA_
AKR1C2	Aldo-keto reductase family 1 member C2	HGNC:385	Up-regulated in DU-145 erastin-resistant clones. Participate in the detoxification of toxic lipid metabolites. May confer partial resistance to erastin by enhancing the detoxification of reactive aldehydes generated downstream of the oxidative destruction of the plasma membrane during ferroptosis.	RNA-seq, glutamate release assay, cell growth, flow cytometry	Human	DU-145 prostate cancer cells	AKR1C2 :-: Ferroptosis	Validated	_NA_	Aldo-keto reductase family 1 member C2	P52895 (AK1C2_HUMAN)	24844246	_NA_
AKR1C3	Aldo-keto reductase family 1 member C3	HGNC:386	Up-regulated in DU-145 erastin-resistant clones. Participate in the detoxification of toxic lipid metabolites. May confer partial resistance to erastin by enhancing the detoxification of reactive aldehydes generated downstream of the oxidative destruction of the plasma membrane during ferroptosis.	RNA-seq, glutamate release assay, cell growth, flow cytometry	Human	DU-145 prostate cancer cells	AKR1C3 :-: Ferroptosis	Validated	_NA_	Aldo-keto reductase family 1 member C3	P42330 (AK1C3_HUMAN)	24844246	_NA_
RB1	RB transcriptional corepressor 1	HGNC:9884	Rb knock-down cells exposed to sorafenib encounter ferroptosis. Lack of Rb sensitized HCC cells to the induction of ferroptosis.	RNA interference, cell viability assay, oxidative stress measurement	Human, mice	HCC cell lines Huh7 and PLC/PRF5; Balb/c nude mice received tumour xenografts derived from HCC cells.	RB1 :-: Ferroptosis	Validated	_NA_	Retinoblastoma-associated protein	P06400 (RB_HUMAN)	25444922	_NA_
HSF1	Heat shock transcription factor 1	HGNC:5224	Knockdown of HSF1 and HSPB1 enhances erastin-induced ferroptosis, whereas heat shock pretreatment and overexpression of HSPB1 inhibits erastin-induced ferroptosis.	RNAi, RT-qPCR, western blot, cell viability	Human, mice	HeLa and U2OS cells, human xenograft mouse tumor derived from HeLa (#CCL-2) cells.	HSF1 :-: Ferroptosis	Validated	_NA_	Heat shock factor protein 1	Q00613 (HSF1_HUMAN)	25728673	_NA_
GCLC	Glutamate-cysteine ligase catalytic subunit	HGNC:4311	RNAi knockdown sensitized cell death induced by cystine starvation.	RNAi, qPCR	Mice	Mouse embryonic fibroblasts	GCLC :+: GSH, GSH :-: Ferroptosis	Validated	_NA_	Glutamate--cysteine ligase catalytic subunit	P48506 (GSH1_HUMAN)	26166707	_NA_
SQSTM1	Sequestosome 1	HGNC:11280	The interaction between p62 and Keap1 increased following erastin and sorafenib treatment. Knockdown of p62 suppressed NRF2 expression and promoted growth inhibition with increased ferroptotic events including GSH depletion, lipid ROS production, and an increase of iron levels.	Immunoprecipitation assay, shRNA knockdown, iron assay, lipid peroxidation assay, glutathione assay, cell viability	Human, mice	HepG2, Hepa1‐6, Hep3B, and SNU‐182 cells	SQSTM1 :-: KEAP1, KEAP1 :-: NFE2L2, NFE2L2 :-: Ferroptosis	Validated	_NA_	Sequestosome-1	Q13501 (SQSTM_HUMAN)	26403645	p62 in article.
NQO1	NAD(P)H quinone dehydrogenase 1	HGNC:2874	Knockdown of p62, quinone oxidoreductase‐1, heme oxygenase‐1, and ferritin heavy chain‐1 by RNA interference in HCC cells promoted ferroptosis in response to erastin and sorafenib.	qRT‐PCR, RNA interference	Human, mice	HepG2, Hepa1‐6, Hep3B, and SNU‐182 cells	NQO1 :-: Ferroptosis	Validated	_NA_	NAD(P)H dehydrogenase [quinone] 1	P15559 (NQO1_HUMAN)	26403645	_NA_
MUC1	Mucin 1, cell surface associated	HGNC:7508	MUC1-C (C-terminal subunit) blocks erastin-induced ferroptosis and induces increases in GSH.	shRNA, GSH level measurement, cell death test	Human	MDA-MB-468, BT-20 cells	MUC1 :+: System Xc-, System Xc- :+: GSH, GSH :-: Ferroptosis	Validated	_NA_	Mucin-1	P15941 (MUC1_HUMAN)	26930718	_NA_
MT1G	Metallothionein 1G	HGNC:7399	A negative regulator of ferroptosis in HCC cells. Knockdown of MT‐1G by RNA interference increases glutathione depletion and lipid peroxidation, which contributes to sorafenib‐induced ferroptosis.	RNA interference, cell viability assay, colony formation assay, western blot, qRT-PCR, glutathione assay, lipid peroxidation assay	Human, mice	HCC cells (HepaG2, Hep3B, and Huh7 cells), nude mice.	MT1G :-: Ferroptosis	Validated	_NA_	Metallothionein-1G	P13640 (MT1G_HUMAN)	27015352	MT‐1G in article
CISD1	CDGSH iron sulfur domain 1	HGNC:30880	Genetic inhibition of CISD1 contributes to erastin-induced ferroptosis. Stabilization of the iron sulfur cluster of CISD1 inhibits ferroptosis.	Cytotoxicity assays, western blot, q-PCR, RNAi	Human	HepG2 and Hep3B cells	CISD1 :-: Mitochondrial lipid ROS, Mitochondrial lipid ROS :+: Ferroptosis	Validated	_NA_	CDGSH iron-sulfur domain-containing protein 1	Q9NZ45 (CISD1_HUMAN)	27510639	_NA_
FANCD2	FA complementation group D2	HGNC:3585	Inhibits erastin-induced ferroptosis. Plays a novel role in the negative regulation of ferroptosis.	Cell viability assay, Q-PCR, western blot, iron assay, lipid peroxidation assay, glutathione assay	Mice	Bone marrow stromal cells	FANCD2 :-: Ferroptosis	Validated	_NA_	Fanconi anemia group D2 protein	Q9BXW9 (FACD2_HUMAN)	27773819	_NA_
FTMT	Ferritin mitochondrial	HGNC:17345	Overexpression significantly inhibited erastin-induced ferroptosis.	Cell viability assay, western blot	Mice, fly	SH-SY5Y cells, drosophila melanogasters W1118, elav-Gal4 and UAS-Fer3HCH	FTMT :-: Labile iron pool, Labile iron pool :+: Ferroptosis	Validated	_NA_	Ferritin	Q8N4E7 (FTMT_HUMAN)	28066232	_NA_
HSPA5	Heat shock protein family A (Hsp70) member 5	HGNC:5238	Negatively regulates ferroptosis. Suppression of HSPA5 expression increased erastin-induced death. Overexpressed HSPA5 inhibited erastin-induced ferroptotic cell death.	Cell viability assay, western blot, shRNA, gene transfection	Human, mice	Pancreatic ductal adenocarcinoma cell lines (PANC1, CFPAC1, MiaPaCa2), nude mice, B6 mice	HSPA5 :+: GPX4, GPX4 :-: Lipid ROS, Lipid ROS :+: Ferroptosis	Validated	_NA_	Endoplasmic reticulum chaperone BiP	P11021 (BIP_HUMAN)	28130223	_NA_
HELLS	Helicase, lymphoid specific	HGNC:4861	LSH inhibits ferroptosis by decreasing the intracellular levels of iron and lipid ROS.	Plate-colony formation assay; measurement of total ROS, Lipid ROS, and intracellular iron	Human, mice	Lung cancer H358 and PC9 cells, SCID Mice	HELLS :+: GLUT1, HELLS :+: SCD, HELLS :+: FADS2, GLUT1 :-: Ferroptosis, SCD :-: Ferroptosis, FADS2 :-: Ferroptosis	Validated	_NA_	Lymphoid-specific helicase	Q9NRZ9 (HELLS_HUMAN)	28900510	LSH in article
SCD	Stearoyl-CoA desaturase	HGNC:10571	Depletion of the SCD1 and FADS2 metabolic genes induces ferroptosis.	shRNA, RT-qPCR, MTT assay, total iron detection, lipid ROS detection	Human	A549 cancer cells	SCD :-: Ferroptosis	Validated	_NA_	Acyl-CoA desaturase	O00767 (ACOD_HUMAN)	28900510	SCD1 in article
FADS2	Fatty acid desaturase 2	HGNC:3575	Depletion of the SCD1 and FADS2 metabolic genes induces ferroptosis.	shRNA, RT-qPCR, MTT assay, total iron detection, lipid ROS detection	Human	A549 cancer cells	FADS2 :-: Ferroptosis	Validated	_NA_	Acyl-CoA 6-desaturase	O95864 (FADS2_HUMAN)	28900510	_NA_
SRC	SRC proto-oncogene, non-receptor tyrosine kinase	HGNC:11283	Src-STAT3 activation renders the cell unable to undergo to ferroptosis. Src inhibition decreased cell viability significantly, and that loss of viability was rescued by ferroptosis inhibitors.	Immunoblotting, RNAi, qPCR, western blot, cell viability	Human	MCF-10A and SUM-159 cells	SRC :+: STAT3, STAT3 :-: ACSL4, ACSL4 :+: Ferroptosis	Validated	_NA_	Proto-oncogene tyrosine-protein kinase Src	P12931 (SRC_HUMAN)	28972104	_NA_
STAT3	Signal transducer and activator of transcription 3	HGNC:11364	Src-STAT3 activation renders the cell unable to undergo to ferroptosis.	Immunoblotting, RNAi, qPCR, western blot, cell viability	Human	MCF-10A and SUM-159 cells	STAT3 :-: ACSL4, ACSL4 :+: Ferroptosis	Validated	_NA_	Signal transducer and activator of transcription 3	P40763 (STAT3_HUMAN)	28972104	_NA_
PML	Promyelocytic leukemia	HGNC:9113	PML expression turned cells highly resistant to ferroptosis.	Cell death assessment	Human	IMR90 cells	PML :-: Ferroptosis	Validated	_NA_	Protein PML	P29590 (PML_HUMAN)	29081404	_NA_
MTOR	Mechanistic target of rapamycin kinase	HGNC:3942	Necessary and sufficient to protect cardiomyocyte cells against ferroptotic cell death. mTOR overexpression suppressed ferroptotic cell death, whereas mTOR deletion exaggerated cell death.	Cell viability assay, ROS production assay, western blot	Mice	Cardiomyocyte cell, C57BL/6 mice	MTOR :-: Ferroptosis	Validated	_NA_	Serine/threonine-protein kinase mTOR	P42345 (MTOR_HUMAN)	29127238	_NA_
NFS1	NFS1 cysteine desulfurase	HGNC:15910	Suppression of NFS1 cooperates with inhibition of cysteine transport to trigger ferroptosis in vitro and slow tumour growth. Suppression of NFS1 predisposes cancer cells to ferroptosis.	RNAi, cell viability assay,flow cytometry	Human	MDA-MB-231 cells, NOD.CB17 Scid/J mice	NFS1 :-: TFRC, TFRC :+: Ferroptosis	Validated	_NA_	Cysteine desulfurase	Q9Y697 (NFS1_HUMAN)	29168506	_NA_
TP63	Tumor protein p63	HGNC:15979	Delta Np63 alpha can inhibit ferroptosis independent of p53. Overexpression protects cells from ferroptosis-inducing agents.	siRNA, cell death quantification	Human	ME-180 cells	TP63 :-: Ferroptosis	Validated	_NA_	Tumor protein 63	Q9H3D4 (P63_HUMAN)	29212036	Delta Np63 alpha in article
CDKN1A	Cyclin dependent kinase inhibitor 1A	HGNC:1784	Required to to suppress ferroptosis.	CRISPR, shRNA, immunoblotting, cell-cycle profile, cell death quantification	Human	HT-1080 cells	CDKN1A :+: GSH, GSH :-: Lipid ROS, Lipid ROS :+: Ferroptosis	Validated	_NA_	Cyclin-dependent kinase inhibitor 1	P38936 (CDN1A_HUMAN)	29346757	Encoding p21
MIR137	microRNA 137	HGNC:31523	Suppresses ferroptosis both in vitro and in vivo.	Immunoblotting, luciferase reporter assay, qRT-PCR, cell viability assay, colony formation assay, malondialdehyde assay, iron assay, flow cytometer, shRNA, xenograph mouse model	Human, mice	Melanoma cell lines A375 and G-361, C57BL/6 mice	MIR137 :-: SLC1A5, SLC1A5 :+: Glutaminolysis, Glutaminolysis :+: Lipid ROS, Lipid ROS :+: Ferroptosis	Validated	_NA_	_NA_	_NA_	29348676	_NA_
ENPP2	Ectonucleotide pyrophosphatase/phosphodiesterase 2	HGNC:3357	Overexpression modestly promotes migration and proliferation and significantly inhibits erastin-induced ferroptosis.	Cell viability assay, qRT-PCR, western blot, ROS measurement, ELISA	Rat	H9c2 cells	ENPP2 :-: Ferroptosis	Validated	_NA_	Ectonucleotide pyrophosphatase/phosphodiesterase family member 2	Q13822 (ENPP2_HUMAN)	29551679	_NA_
FH	Fumarate hydratase	HGNC:3700	FH inactivation (FH-/- ) proves synthetic lethal with inducers of ferroptosis. FH-/- sensitizes cells to multiple ferroptosis inducers.	CRISPR/Cas9, sgRNA, cell viability assay, immunoblotting, qPCR,	Human	UOK262, HT1080, HK2, A498 cells	FH :+: GPX4, GPX4 :-: Ferroptosis	Validated	_NA_	Fumarate hydratase	P07954 (FUMH_HUMAN)	29917289	_NA_
CISD2	CDGSH iron sulfur domain 2	HGNC:24212	Overexpression conferred resistance to ferroptosis. Inhibition blocked resistance to ferroptotic cell death.	Cell viability and death assay, GSH and ROS levels and lipid peroxidation assays, RNAi, gene transfection, immunoblotting	Human	Head and neck cancer cells	CISD2 :-: Lipid ROS, Lipid ROS :+: Ferroptosis	Validated	_NA_	CDGSH iron-sulfur domain-containing protein 2	Q8N5K1 (CISD2_HUMAN)	29928961	_NA_
MIR9-1	microRNA 9-1	HGNC:31641	Overexpression of miR‐9 suppressed GOT1, which subsequently reduced ferroptosis. Suppression of miR‐9 increased the sensitivity of melanoma cells to ferroptosis inducers.	Immunoblotting, luciferase reporter assay, qPCR, cell viability assay, MDA assay, iron assay, glutamate assay	Human	A375 and G‐361 cells	MIR9 :-: GOT1, GOT1 :+: alpha KG, alpha KG :+: Lipid ROS, Lipid ROS :+: Ferroptosis	Validated	_NA_	_NA_	_NA_	30035324	miR-9 in article
MIR9-2	microRNA 9-2	HGNC:31642	Overexpression of miR‐9 suppressed GOT1, which subsequently reduced ferroptosis. Suppression of miR‐9 increased the sensitivity of melanoma cells to ferroptosis inducers.	Immunoblotting, luciferase reporter assay, qPCR, cell viability assay, MDA assay, iron assay, glutamate assay	Human	A375 and G‐361 cells	MIR9 :-: GOT1, GOT1 :+: alpha KG, alpha KG :+: Lipid ROS, Lipid ROS :+: Ferroptosis	Validated	_NA_	_NA_	_NA_	30035324	miR-9 in article
MIR9-3	microRNA 9-3	HGNC:31646	Overexpression of miR‐9 suppressed GOT1, which subsequently reduced ferroptosis. Suppression of miR‐9 increased the sensitivity of melanoma cells to ferroptosis inducers.	Immunoblotting, luciferase reporter assay, qPCR, cell viability assay, MDA assay, iron assay, glutamate assay	Human	A375 and G‐361 cells	MIR9 :-: GOT1, GOT1 :+: alpha KG, alpha KG :+: Lipid ROS, Lipid ROS :+: Ferroptosis	Validated	_NA_	_NA_	_NA_	30035324	miR-9 in article
ISCU	Iron-sulfur cluster assembly enzyme	HGNC:29882	Over expression significantly attenuated DHA induced ferroptosis.	Cell viability, cell cycle, ROS determination, western blot, immunofluorescence, ectopic expressing, lentiviral transduction	Human	HL60, KG1, THP-1 cells	ISCU :+: GSH, GSH :-: Ferroptosis	Validated	_NA_	Iron-sulfur cluster assembly enzyme ISCU	Q9H1K1 (ISCU_HUMAN)	30557609	_NA_
ACSL3	Acyl-CoA synthetase long chain family member 3	HGNC:3570	Required for exogenous monounsaturated fatty acids to protect cells against ferroptosis. Negatively correlates with ferroptosis sensitivity.	Dead cell count, gene knockout, confocal imaging, thin-layer chromatography, BODIPY 493/503 imaging, CRISPR/Cas9, RT-qPCR, western blot	Human	HEK293, HT-1080 cells	ACSL3 :-: Ferroptosis	Validated	_NA_	Long-chain-fatty-acid--CoA ligase 3	O95573 (ACSL3_HUMAN)	30686757	_NA_
OTUB1	OTU deubiquitinase, ubiquitin aldehyde binding 1	HGNC:23077	Inactivation promotes ferroptosis by down-regulating SLC7A11 levels. Overexpression is critical for tumor growth.	CRISPR/Cas9, RNAi, cell death, western blot, qRT-PCR	Human, mice	H1299, SK-N-BE(2)C, T24, UM-UC-3, SW780 cells, nude mice	OTUB1 :+: SLC7A11, SLC7A11 :-: Ferroptosis	Validated	_NA_	Ubiquitin thioesterase OTUB1	Q96FW1 (OTUB1_HUMAN)	30709928	_NA_
CD44	CD44 molecule (Indian blood group)	HGNC:1681	Knockdown sensitizes cells to ferroptosis.	Western blot, siRNA, cell death	Human	H1299 cells	CD44 :+: SLC7A11, SLC7A11 :-: Ferroptosis	Validated	_NA_	CD44 antigen	P16070 (CD44_HUMAN)	30709928	_NA_
LINC00336	Long intergenic non-protein coding RNA 336	HGNC:33813	Overexpression inhibits ferroptosis. Knockdown promotes ferroptosis.	qRT-PCR, MTT assay, colony-formation assay, lipid ROS assays, iron assay, immunoblotting	Human	A549 and SPC-A-1 cells	(LINC00336/ELAVL1) :-: Ferroptosis	Validated	_NA_	Putative uncharacterized protein encoded by LINC00336	Q6ZUF6 (NC336_HUMAN)	30787392	_NA_
BRD4	Bromodomain containing 4	HGNC:13575	Inhibition induces ferroptosis.	Cell proliferation assay, migration and invasion assays, RT-PCR, western blot, immunohistochemistry, iron assay	Human	MDA-MB-231, Hs578T, H1299, A549 and MCF-10A cells, female athymic BALB/c nude mice	BRD4 :-: Ferritinophagy, Ferritinophagy :+: Lipid ROS, Lipid ROS :+: Ferroptosis	Validated	_NA_	Bromodomain-containing protein 4	O60885 (BRD4_HUMAN)	30988278	_NA_
PRDX6	Peroxiredoxin 6	HGNC:16753	A negative regulator of ferroptotic cell death.	Western blot, flow cytometry, SRB assay, gene transfection, shRNA, LOOH quantification	Human	H1299 cells	PRDX6 :-: Lipid ROS, Lipid ROS :+: Ferroptosis	Validated	_NA_	Peroxiredoxin-6	P30041 (PRDX6_HUMAN)	31036877	_NA_
MIR17	microRNA 17	HGNC:31547	Protects endothelial HUVEC cells from erastin-induced ferroptosis. Overexpression significantly reduced erastin-induced growth inhibition and ROS generation of HUVEC cells.	Lentivirus transduction, CCK-8 assay, DYE670 staining assay, ROS staining assay, RT-qPCR, western blot	Human	HUVEC cells	MIR17 :-: A20, A20 :+: ACSL4, ACSL4 :+: Lipid ROS, A20 :-: GPX4, GPX4 :-: Lipid ROS, Lipid ROS :+: Ferroptosis	Validated	_NA_	_NA_	_NA_	31160087	miR-17-92 in article
NF2	Neurofibromin 2	HGNC:7773	Genetic inactivation of NF2 rendered cancer cells more sensitive to ferroptosis. Mediates cell density-dependent inhibition of ferroptosis.	Cell death, cell viability, lipid peroxidation, immunoblotting, CRISPR/Cas9, ChIP assay, qRT-PCR	Human, mice	Mouse embryonic fibroblasts, NF639 cells, human epithelial tumour cells, human mesothelioma cells, xenograft mouse	NF2 :-: YAP, YAP :+: Ferroptosis	Validated	_NA_	Merlin	P35240 (MERL_HUMAN)	31341276	Also known as merlin
ARNTL	Aryl hydrocarbon receptor nuclear translocator like	HGNC:701	Degration of the protein is critical for ferroptosis. Blocking ARNTL degradation diminished ferroptotic tumor cell death.	Cytotoxicity assays, western blot, immunoprecipitation, RNA interference, gene transfection, qPCR, MDA assay	Human, mice	Calu-1, THP1, HT1080, and HL-60 cells, athymic nude mice	ARNTL :-: EGLN2, EGLN2 :-: HIF1A, HIF1A :-: Lipid ROS, Lipid ROS :+: Ferroptosis	Validated	_NA_	Aryl hydrocarbon receptor nuclear translocator-like protein 1	O00327 (BMAL1_HUMAN)	31355331	_NA_
JUN	Jun proto-oncogene, AP-1 transcription factor subunit	HGNC:6204	O-GlcNAcylated c-Jun represents an obstructive factor to ferroptosis.	Immunofluorescence, western blotting, immunohistochemistry, cell viability, colony formation, qPCR, lipid peroxidation assay, iron assay	Human, mice	Bel-7402, SMMC-7721 cells, athymic nude mice	JUN :+: GSH, GSH :-: Ferroptosis, JUN :+: PSAT1, PSAT1 :-: Ferroptosis, JUN :+: CBS, CBS :-: Ferroptosis	Deduced	_NA_	Transcription factor AP-1	P05412 (JUN_HUMAN)	31394193	c-Jun in article
CA9	Carbonic anhydrase 9	HGNC:1383	Inhibition induces ferroptosis.	qRT-PCR, western blot, cell viability assay, siRNA, ROS detection	Human	Mesothelioma cell lines ACC-Meso-1, NCI-H2373 and NCI-H2052, mesothelial cell line MeT-5A	CA9 :-: Ferroptosis	Validated	_NA_	Carbonic anhydrase 9	Q16790 (CAH9_HUMAN)	31442913	_NA_
TMBIM4	Transmembrane BAX inhibitor motif containing 4	HGNC:24257	Protects against ferroptosis in HCC cells. Inhibition increased ferroptotic cel death.	Cell viability and clonogenic survival assay, immunofluorescence, western blot, RNAi, gene transfection, qRT-PCR, lipid peroxidation assay	Human, mice	Hep G2, Huh‐7, SMMC‐7721 and PLC/PRF/5 cells, nude mice	S1R :-: Ferroptosis	Validated	_NA_	Protein lifeguard 4	Q9HC24 (LFG4_HUMAN)	31507082	S1R in article
PLIN2	Perilipin 2	HGNC:248	An indispensable gene and protein in the suppression of ferroptosis caused by abnormal lipometabolism in gastric carcinoma.	Cell proliferation and clonogenic assay, cell survival analysis, xenografts tumor, RNA-seq, RT‑qPCR, ROS assay	Human, mice	SGC7901 and MGC803 cells, nude mice	PLIN2 :-: Ferroptosis	Screened	_NA_	Perilipin-2	Q99541 (PLIN2_HUMAN)	31520166	Also known as ADRP
MIR212	microRNA 212	HGNC:31589	Overexpression of miR-212-5p attenuated ferroptosis while downregulation of miR-212-5p promoted ferroptotic cell death.	Controlled cortical impact model, iron assay, MDA assay, RT-PCR, western blotting, cell death	Mice	HT22 and Neuro-2a cells, C57BL/6 J mice	(miR-212-5p/Ptgs2) :-: Ferroptosis	Validated	_NA_	_NA_	_NA_	31533781	miR-212-5p in article
Fer1HCH	Ferritin 1 Heavy Chain Homolog	_NA_	Reduced heavy chain levels caused severe mitochondrial defects and ferroptosis.	RT-qPCR, immunohistochemistry, EdU staining, TUNEL staining	Drosophila	Fly	Fer1HCH :-: ROS, ROS :+: Ferroptosis	Predicted	_NA_	Ferritin	H1UUD2 (H1UUD2_DROME)	31568497	_NA_
AIFM2	Apoptosis inducing factor mitochondria associated 2	HGNC:21411	A glutathione-independent ferroptosis suppressor. Pharmacological targeting of FSP1 strongly synergizes with GPX4 inhibitors to trigger ferroptosis.	Expression cloning, cell death, cell viability, LDH assay, western blot, LC-MS, NADH consumption assay	Human, mice	MCF-7, HT1080, Pfa1 cells	FPS1 :+: CoQ10, CoQ10 :-: Lipid ROS, Lipid ROS :+: Ferroptosis	Validated	_NA_	Apoptosis-inducing factor 2	Q9BRQ8 (AIFM2_HUMAN)	31634899	FSP1 in article
LAMP2	Lysosomal associated membrane protein 2	HGNC:6501	Knockdown promoted ferroptosis.	Cell viability, western blot, ROS induction, glutathione assay, lipid peroxidation assay	Human	ARPE-19, hfRPE cells	LAMP2 :+: Cysteine, Cysteine :+: GSH, GSH :-: Lipid ROS, Lipid ROS :+: Ferroptosis	Validated	_NA_	Lysosome-associated membrane glycoprotein 2	P13473 (LAMP2_HUMAN)	31672277	_NA_
ZFP36	ZFP36 ring finger protein	HGNC:12862	ZFP36 plasmid impaired FBXW7 plasmid-induced HSC ferroptosis. Overexpression of Zfp36 impaired erastin- or sorafenib-induced ferroptosis.	Cell viability, lipid peroxidation, iron, GSH and ROS assays, western blot, RT-PCR, RNA-seq	Human, mice	Hepatic stellate cells, C57BL/6 mice	ZFP36 :-: ATG16L1, ATG16L1 :+: Ferroptosis	Validated	_NA_	mRNA decay activator protein ZFP36	P26651 (TTP_HUMAN)	31679460	_NA_
PROM2	Prominin 2	HGNC:20685	Induced by ferroptotic stress and promotes resistance to ferroptotic cell death. Facilitates ferroptosis resistance in mammary epithelial and breast carcinoma cells.	RNA-seq, western blot, qPCR, siRNA, cell count, cell death, iron assay	Human	MCF10A, Hs578t and MDA-MB-231 cells	Prominin2 :+: Ferritin-containing MVB, Ferritin-containing MVB :-: Ferroptosis	Validated	_NA_	Prominin-2	Q8N271 (PROM2_HUMAN)	31735663	Prominin2 in article
CHMP5	Charged multivesicular body protein 5	HGNC:26942	Ferroptosis activators increase ESCRT-III subunits (e.g., CHMP5 and CHMP6). Knockdown of CHMP5 or CHMP6 sensitizes human cancer cells to ferroptosis.	RNAi, western blot, iron, malondialdehyde and cytotoxicity assays	Human, mice	PANC1 and HepG2 cells, athymic nude or B6 mice	CHMP5 :-: Ferroptosis	Validated	_NA_	Charged multivesicular body protein 5	Q9NZZ3 (CHMP5_HUMAN)	31761326	_NA_
CHMP6	Charged multivesicular body protein 6	HGNC:25675	Ferroptosis activators increase ESCRT-III subunits (e.g., CHMP5 and CHMP6). Knockdown of CHMP5 or CHMP6 sensitizes human cancer cells to ferroptosis.	RNAi, western blot, iron, malondialdehyde and cytotoxicity assays	Human, mice	PANC1 and HepG2 cells, athymic nude or B6 mice	CHMP6 :-: Ferroptosis	Validated	_NA_	Charged multivesicular body protein 6	Q96FZ7 (CHMP6_HUMAN)	31761326	_NA_
CAV1	Caveolin 1	HGNC:1527	Cav-1 deficiency aggravated ferroptosis. Short hairpin RNA of Cav-1 promoted ferroptosis, which was ameliorated by Cav-1 overexpression.	Immunofluorescence, western blot, ROS detection	Human, mice	LO2 cells, mice model	CAV-1 :+: xCT, xCT :+: GPX4, GPX4 :-: Ferroptosis, CAV-1 :-: RNS, RNS :+: Ferroptosis	Validated	_NA_	Caveolin-1	Q03135 (CAV1_HUMAN)	31877357	Cav-1 in article
GCH1	GTP cyclohydrolase 1	HGNC:4193	Gch1 overexpression and its downstream metabolites BH4/BH2 rescue from ferroptosis. Inhibition of GCH1 activity can sensitize resistant cancer cells to ferroptosis induction.	CRISPR activation screening, qRT-PCR, cell viability, cell counts, western blot	Human	HT-1080,786-O, A-498, Caki-1, AU565, DU4475, MCF-7 cells	GCH1 :+: Phospholipid, Phospholipid :-: Ferroptosis, GCH1 :+: COQ10, COQ10 :-: Lipid ROS, Lipid ROS :+: Ferroptosis	Validated	_NA_	GTP cyclohydrolase 1	P30793 (GCH1_HUMAN)	31989025	_NA_

## Sheet: Table S2
Pearson correlation	Interaction
LINC00942	MINCR
LINC01564	HOTAIR
LINC02561	LINC00668
ACBD3-AS1	CYTOR
ANKRD44-AS1	CDKN2B-AS1
AQP4-AS1	PRDM16-DT
HHATL-AS1	DBH-AS1
LINC01267	SNHG7
LINC02265	PVT1
SRGAP3-AS2	PANDAR
LINC02471	MALAT1
SFTA1P	H19
ADAMTS9-AS1	LNCSRLR
ADAMTS9-AS2	NEAT1
C5orf64	LINC00460
CARD8-AS1	DANCR
FENDRR	MEG3
HID1-AS1	LINC-ROR
HLA-DQB1-AS1	PACERR
LINC00656	SLC7A11-AS1
LINC00968	ZEB1-AS1
LINC00996	MIAT
LINC01352	XIST
LINC01645	SNHG6
LINC01996	ZFAS1
LINC02016	SNHG1
LINC02285	HAGLR
LINC02345	SNHG16
LINC02828	UCA1
MAGI2-AS3	OIP5-AS1
MGC27382
MIR497HG
PCAT19
PCED1B-AS1
SENCR
TBX5-AS1
TRG-AS1
ZEB2-AS1
ARHGEF2-AS1
C2orf91
GATA6-AS1
HLX-AS1
LDLRAD4-AS1
LHFPL3-AS2
LINC00163
LINC00472
LINC00551
LINC00607
LINC01028
LINC01070
LINC01082
LINC01197
LINC01290
LINC01836
LINC01852
LINC01985
LINC02104
LINC02817
MED4-AS1
MYO16-AS1
NAV2-AS2
PACRG-AS3
PGM5-AS1
PGM5P4-AS1
WWC2-AS2
SNHG1
C8orf34-AS1
DDX11-AS1
HHIP-AS1
LINC00261
MIR22HG
MIR924HG
RBPMS-AS1
SNHG17
TMPO-AS1
TYMSOS
WDFY3-AS2
LINC00511
PCAT6
CDKN2B-AS1
NR4A1AS
ADPGK-AS1
LINC00892
LINC01684
LINC01857
LINC02528
LINC02611
PSMB8-AS1
LINC01506
MELTF-AS1
SCAT2
PACERR
ACOXL-AS1
PRDM16-DT
PPP1R14B-AS1
SLC2A1-AS1
SLC7A11-AS1
LINC02126
LINC02541
MIR205HG
CLMAT3
LINC00924
LINC00987
LINC02202

## Sheet: Table S3
symbol	coeffecients	pvalue	hazard_ratio	lower_95	upper_95
LINC00460	0.173204	0.0001387	1.18911	1.08775	1.29991
UCA1	0.126572	0.00209379	1.13493	1.04701	1.23024
WWC2-AS2	0.897782	0.00215125	2.45415	1.38312	4.35457
LINC00892	-0.636513	0.00498022	0.529134	0.339343	0.825075
DANCR	-0.15824	0.00688103	0.853645	0.761092	0.957452
MED4-AS1	-0.591374	0.0236296	0.553566	0.331696	0.923843
AQP4-AS1	-0.856813	0.0330604	0.424513	0.193065	0.933422
LINC00996	-0.335638	0.0351181	0.714882	0.523167	0.976851
SNHG7	-0.137344	0.0434978	0.87167	0.762861	0.995999
LINC-ROR	1.83703	0.0435681	6.27785	1.05446	37.376
TRG-AS1	-0.285377	0.0448231	0.751731	0.568837	0.993429
LINC01857	-0.132681	0.0458113	0.875744	0.768824	0.997534
LINC01028	2.03797	0.0482598	7.67503	1.01571	57.9948

## Sheet: Table S4
symbol	p.value	HR	Low 95%CI	High 95%CI	KMplot_pvalue
MED4-AS1	0.0236296	0.553566	0.331696	0.923843	0.00270408
LINC00892	0.00498022	0.529134	0.339343	0.825075	0.0027122
WWC2-AS2	0.00215125	2.45415	1.38312	4.35457	0.00297409
UCA1	0.00209379	1.13493	1.04701	1.23024	0.00344542
LINC00996	0.0351181	0.714882	0.523167	0.976851	0.0118719
AQP4-AS1	0.0330604	0.424513	0.193065	0.933422	0.0322189
DANCR	0.00688103	0.853645	0.761092	0.957452	0.0322267
LINC01857	0.0458113	0.875744	0.768824	0.997534	0.0350789
SNHG7	0.0434978	0.87167	0.762861	0.995999	0.0409796
LINC00460	0.0001387	1.18911	1.08775	1.29991	0.0414409
TRG-AS1	0.0448231	0.751731	0.568837	0.993429	0.0506929
LINC01028	0.0482598	7.67503	1.01571	57.9948	0.820731
LINC-ROR	0.0435681	6.27785	1.05446	37.376	0.907734

## Sheet: Table S5
gene	coef
AQP4-AS1	-0.268
DANCR	-0.041
LINC00460	0.122
LINC00892	-0.39
LINC00996	-0.144
MED4-AS1	-0.198
SNHG7	-0.028
UCA1	0.092
WWC2-AS2	0.497

## Sheet: Table S6
gene	log2FC	pvalue	adjusted_pvalue
BTLA	-0.88713	1.05e-22	6.95e-21
CD40LG	-0.787774	1.99e-21	6.55e-20
CD27	-0.390655	3.17e-16	6.97e-15
CD276	0.105668	2.26e-15	3.74e-14
CD96	-0.457835	1.33e-14	1.75e-13
CTLA4	-0.448464	1.84e-13	2.02e-12
CD160	-0.584074	2.86e-13	2.69e-12
CD226	-0.560386	3.78e-13	3.11e-12
TIGIT	-0.442157	2.2e-12	1.61e-11
BTN2A2	-0.21035	9.28e-11	6.13e-10
ICOS	-0.417574	1.06e-09	6.34e-09
LAG3	-0.35568	1.27e-09	7.01e-09
HLA-DOB	-0.29118	1.6e-09	8.14e-09
PDCD1	-0.384157	1.65e-08	7.77e-08
BTNL9	-0.546341	4.3e-08	1.89e-07
CD28	-0.352351	6.32e-08	2.61e-07
ADORA2A	-0.418366	2.15e-07	8.35e-07
HLA-DMB	-0.17284	4.3e-07	1.58e-06
PVR	0.0924833	5.21e-07	1.81e-06
IDO1	-0.257314	4.92e-06	1.62e-05
HLA-DMA	-0.108747	7.12e-06	2.24e-05
HLA-DPB1	-0.0982642	8.35e-06	2.5e-05
TNFRSF14	-0.126282	1.06e-05	3.04e-05
HLA-DOA	-0.175073	1.53e-05	4.2e-05
BTN3A1	-0.111409	2.18e-05	5.76e-05
LGALS9	-0.117497	3.89e-05	9.88e-05
BTN2A1	-0.0676315	5.48e-05	0.00013394
TNFSF14	-0.289238	0.00010871	0.00025624
TNFSF18	-0.425156	0.00014046	0.00031967
HLA-DPA1	-0.0926594	0.0005546	0.00122012
CD274	-0.200583	0.00100555	0.00214085
HLA-DRA	-0.0548725	0.00103801	0.00214089
TNFSF9	0.16523	0.00185247	0.00370495
KIR3DL2	-0.854009	0.00243187	0.00472069
CD80	-0.210092	0.00262287	0.00494598
HAVCR2	-0.105627	0.00773748	0.0140408
TNFRSF4	-0.122246	0.00787138	0.0140408
KIR2DL1	-1.05107	0.00893125	0.0155122
CD86	-0.0972837	0.00934425	0.0158134
HLA-DRB1	-0.0475354	0.00986521	0.0162776
HLA-E	-0.0257053	0.012881	0.0207352
HLA-DQB1	-0.0784098	0.0145337	0.0228387
PDCD1LG2	-0.133649	0.0163436	0.0250856
HLA-DRB5	-0.0595109	0.0250347	0.0375521
CEACAM1	-0.09249	0.0300299	0.0440438
